# Supplementary material for: A Systematic Review of Artificial Intelligence Models for Time-to-Event Outcome Applied in Cardiovascular Disease Risk Prediction
Source: PubMed Central journal article supplement (PMC11271333; doi:10.1007/s10916-024-02087-7), 2024-07-19
Supplement: 10916_2024_2087_MOESM1_ESM.pdf [file 10916_2024_2087_MOESM1_ESM.pdf]

**A Systematic Review of Artificial Intelligence Models for Time-to-Event  
Outcome applied in Cardiovascular Disease Risk Prediction**

**Supplementary Material**

**Supplementary Tables**

**Table S1.** Reporting checklist

**Table S2.** OVID Medline search terms and result

**Table S3.** Studies excluded at full text screening stage

**Table S4.** Characteristics of the studies included in the systematic review

**Table S5.** Characteristics of survival prediction models used for cardiovascular disease risk prediction

**Table S6.** Patient recruitment year, missing data management, hyperparameter tuning, and software (including libraries/packages) utilised

**Table S1.** Reporting checklist

| Section and Topic             | Item # | Checklist item                                                                                                                                                                                                                                                                                       | Location where item is reported* |
|-------------------------------|--------|------------------------------------------------------------------------------------------------------------------------------------------------------------------------------------------------------------------------------------------------------------------------------------------------------|----------------------------------|
| <b>TITLE</b>                  |        |                                                                                                                                                                                                                                                                                                      |                                  |
| Title                         | 1      | Identify the report as a systematic review.                                                                                                                                                                                                                                                          | Page 1                           |
| <b>ABSTRACT</b>               |        |                                                                                                                                                                                                                                                                                                      |                                  |
| Abstract                      | 2      | See the PRISMA 2020 for Abstracts checklist.                                                                                                                                                                                                                                                         | Page 2                           |
| <b>INTRODUCTION</b>           |        |                                                                                                                                                                                                                                                                                                      |                                  |
| Rationale                     | 3      | Describe the rationale for the review in the context of existing knowledge.                                                                                                                                                                                                                          | Page 6 & 7                       |
| Objectives                    | 4      | Provide an explicit statement of the objective(s) or question(s) the review addresses.                                                                                                                                                                                                               | Page 6 & 7                       |
| <b>METHODS</b>                |        |                                                                                                                                                                                                                                                                                                      |                                  |
| Eligibility criteria          | 5      | Specify the inclusion and exclusion criteria for the review and how studies were grouped for the syntheses.                                                                                                                                                                                          | Page 8 & 9, and Table 1          |
| Information sources           | 6      | Specify all databases, registers, websites, organisations, reference lists and other sources searched or consulted to identify studies. Specify the date when each source was last searched or consulted.                                                                                            | Page 9 & 10, and Table S5        |
| Search strategy               | 7      | Present the full search strategies for all databases, registers and websites, including any filters and limits used.                                                                                                                                                                                 | 9 & 10, and Table S2             |
| Selection process             | 8      | Specify the methods used to decide whether a study met the inclusion criteria of the review, including how many reviewers screened each record and each report retrieved, whether they worked independently, and if applicable, details of automation tools used in the process.                     | Page 10                          |
| Data collection process       | 9      | Specify the methods used to collect data from reports, including how many reviewers collected data from each report, whether they worked independently, any processes for obtaining or confirming data from study investigators, and if applicable, details of automation tools used in the process. | Page 10                          |
| Data items                    | 10a    | List and define all outcomes for which data were sought. Specify whether all results that were compatible with each outcome domain in each study were sought (e.g. for all measures, time points, analyses), and if not, the methods used to decide which results to collect.                        | Page 10 and Table 1              |
|                               | 10b    | List and define all other variables for which data were sought (e.g. participant and intervention characteristics, funding sources). Describe any assumptions made about any missing or unclear information.                                                                                         | Page 10                          |
| Study risk of bias assessment | 11     | Specify the methods used to assess risk of bias in the included studies, including details of the tool(s) used, how many reviewers assessed each study and whether they worked independently, and if applicable, details of automation tools used in the process.                                    | Page 11                          |

| Section and Topic         | Item # | Checklist item                                                                                                                                                                                                                                              | Location where item is reported*          |
|---------------------------|--------|-------------------------------------------------------------------------------------------------------------------------------------------------------------------------------------------------------------------------------------------------------------|-------------------------------------------|
| Effect measures           | 12     | Specify for each outcome the effect measure(s) (e.g. risk ratio, mean difference) used in the synthesis or presentation of results.                                                                                                                         | Page 10, 11: e.g., prediction performance |
| Synthesis methods         | 13a    | Describe the processes used to decide which studies were eligible for each synthesis (e.g. tabulating the study intervention characteristics and comparing against the planned groups for each synthesis (item #5)).                                        | Page 10 & 11                              |
|                           | 13b    | Describe any methods required to prepare the data for presentation or synthesis, such as handling of missing summary statistics, or data conversions.                                                                                                       | Page 10 & 11                              |
|                           | 13c    | Describe any methods used to tabulate or visually display results of individual studies and syntheses.                                                                                                                                                      | Page 10 & 11                              |
|                           | 13d    | Describe any methods used to synthesize results and provide a rationale for the choice(s). If meta-analysis was performed, describe the model(s), method(s) to identify the presence and extent of statistical heterogeneity, and software package(s) used. |                                           |
|                           | 13e    | Describe any methods used to explore possible causes of heterogeneity among study results (e.g. subgroup analysis, meta-regression).                                                                                                                        | N/A                                       |
|                           | 13f    | Describe any sensitivity analyses conducted to assess robustness of the synthesized results.                                                                                                                                                                | N/A                                       |
| Reporting bias assessment | 14     | Describe any methods used to assess risk of bias due to missing results in a synthesis (arising from reporting biases).                                                                                                                                     | N/A                                       |
| Certainty assessment      | 15     | Describe any methods used to assess certainty (or confidence) in the body of evidence for an outcome.                                                                                                                                                       | N/A                                       |
| <b>RESULTS</b>            |        |                                                                                                                                                                                                                                                             |                                           |
| Study selection           | 16a    | Describe the results of the search and selection process, from the number of records identified in the search to the number of studies included in the review, ideally using a flow diagram.                                                                | Page 11 & 12                              |
|                           | 16b    | Cite studies that might appear to meet the inclusion criteria, but which were excluded, and explain why they were excluded.                                                                                                                                 | Page 11 and Table S3                      |
| Study characteristics     | 17     | Cite each included study and present its characteristics.                                                                                                                                                                                                   | Page 10 & 11, and Table S4                |
| Risk of bias in studies   | 18     | Present assessments of risk of bias for each included study.                                                                                                                                                                                                | Page 23 & 24                              |
| Results of individual     | 19     | For all outcomes, present, for each study: (a) summary statistics for each group (where appropriate) and (b) an effect estimate and its precision (e.g. confidence/credible interval), ideally using structured tables or plots.                            | Table 12 & 13, and Table S4               |

| Section and Topic         | Item # | Checklist item                                                                                                                                                                                                                                                                       | Location where item is reported* |
|---------------------------|--------|--------------------------------------------------------------------------------------------------------------------------------------------------------------------------------------------------------------------------------------------------------------------------------------|----------------------------------|
| studies                   |        |                                                                                                                                                                                                                                                                                      |                                  |
| Results of syntheses      | 20a    | For each synthesis, briefly summarise the characteristics and risk of bias among contributing studies.                                                                                                                                                                               | Page 12-22, and Table S4         |
|                           | 20b    | Present results of all statistical syntheses conducted. If meta-analysis was done, present for each the summary estimate and its precision (e.g. confidence/credible interval) and measures of statistical heterogeneity. If comparing groups, describe the direction of the effect. | N/A                              |
|                           | 20c    | Present results of all investigations of possible causes of heterogeneity among study results.                                                                                                                                                                                       | N/A                              |
|                           | 20d    | Present results of all sensitivity analyses conducted to assess the robustness of the synthesized results.                                                                                                                                                                           | N/A                              |
| Reporting biases          | 21     | Present assessments of risk of bias due to missing results (arising from reporting biases) for each synthesis assessed.                                                                                                                                                              | N/A                              |
| Certainty of evidence     | 22     | Present assessments of certainty (or confidence) in the body of evidence for each outcome assessed.                                                                                                                                                                                  | N/A                              |
| <b>DISCUSSION</b>         |        |                                                                                                                                                                                                                                                                                      |                                  |
| Discussion                | 23a    | Provide a general interpretation of the results in the context of other evidence.                                                                                                                                                                                                    | Page 24-31, Figure 8             |
|                           | 23b    | Discuss any limitations of the evidence included in the review.                                                                                                                                                                                                                      | Page 31-33                       |
|                           | 23c    | Discuss any limitations of the review processes used.                                                                                                                                                                                                                                | Page 32 & 33                     |
|                           | 23d    | Discuss implications of the results for practice, policy, and future research.                                                                                                                                                                                                       | Page 31 & 32                     |
| <b>OTHER INFORMATION</b>  |        |                                                                                                                                                                                                                                                                                      |                                  |
| Registration and protocol | 24a    | Provide registration information for the review, including register name and registration number, or state that the review was not registered.                                                                                                                                       | Page 8                           |
|                           | 24b    | Indicate where the review protocol can be accessed, or state that a protocol was not prepared.                                                                                                                                                                                       | Page 8                           |
|                           | 24c    | Describe and explain any amendments to information provided at registration or in the protocol.                                                                                                                                                                                      | N/A                              |
| Support                   | 25     | Describe sources of financial or non-financial support for the review, and the role of the funders or sponsors in the review.                                                                                                                                                        | Page 31                          |
| Competing interests       | 26     | Declare any competing interests of review authors.                                                                                                                                                                                                                                   | Page 34                          |
| Availability of           | 27     | Report which of the following are publicly available and where they can be found: template data collection forms;                                                                                                                                                                    | Page 36                          |

| Section and Topic              | Item # | Checklist item                                                                                                           | Location where item is reported* |
|--------------------------------|--------|--------------------------------------------------------------------------------------------------------------------------|----------------------------------|
| data, code and other materials |        | data extracted from included studies; data used for all analyses; analytic code; any other materials used in the review. |                                  |

\* Page numbers are assigned during manuscript submission, but they will change once the manuscript is published.

**Table S2.** OVID Medline search terms and result

| No. | Mesh Terms and Keywords                                                                                                                                                                                                                                                                                                                                                                                                                                                                                                                            | Results from<br>21 Dec 2023 |
|-----|----------------------------------------------------------------------------------------------------------------------------------------------------------------------------------------------------------------------------------------------------------------------------------------------------------------------------------------------------------------------------------------------------------------------------------------------------------------------------------------------------------------------------------------------------|-----------------------------|
| 1   | cardiovascular diseases/ or heart diseases/ or cardiomyopathies/ or heart failure/                                                                                                                                                                                                                                                                                                                                                                                                                                                                 | 422,519                     |
| 2   | myocardial ischemia/ or acute coronary syndrome/ or angina pectoris/ or coronary artery disease/ or myocardial infarction/ or peripheral vascular diseases/ or peripheral arterial disease/                                                                                                                                                                                                                                                                                                                                                        | 343,875                     |
| 3   | cerebrovascular disorders/ or stroke/ or hemorrhagic stroke/ or ischemic stroke/                                                                                                                                                                                                                                                                                                                                                                                                                                                                   | 187,394                     |
| 4   | ((cardiovascular or cerebrovascular or cerebral vascular or coronary or heart or cardiac or myocardi*) adj3 (disease* or isch ?emi* or infarct* or failure)).mp.                                                                                                                                                                                                                                                                                                                                                                                   | 1,142,616                   |
| 5   | (cerebrovascular accident* or ar?hythmia* or arr?ythmia or angina pectoris or unstable angina or stable angina or coronary syndrome or stroke or adverse cardiac event or major adverse cardiovascular event* or heart attack* or cardiovascular mortality or cardiovascular death or out-of-hospital cardiac arrest or cardiomyopath* or (peripheral adj2 disease*)).mp.                                                                                                                                                                          | 698,884                     |
| 6   | or/1-5                                                                                                                                                                                                                                                                                                                                                                                                                                                                                                                                             | 1,587,346                   |
| 7   | algorithms/ or artificial intelligence/ or machine learning/ or deep learning/ or supervised machine learning/                                                                                                                                                                                                                                                                                                                                                                                                                                     | 369,070                     |
| 8   | (Artificial intelligence or machine learning or deep learning or random survival forest or Extra Survival Trees or survival ensembles or boosting or survival support vector machine or Multi-Task Logistic Regression or DeepSurv or Non Linear Cox proportional hazard model* or Cox-time or CoxTime or Cox-CC or CoxCC or probability mass function or Nnet-survival or DeepHit or DeepHitSingle or Piecewise Constant Hazard model* or Discrete-Time Model* or Continuous-Time Model* or Neural network* or deep neural survival network*).mp. | 192,170                     |
| 9   | or/7-8                                                                                                                                                                                                                                                                                                                                                                                                                                                                                                                                             | 450,589                     |
| 10  | Forecasting/ or Risk Assessment/ or Prognosis/                                                                                                                                                                                                                                                                                                                                                                                                                                                                                                     | 959,838                     |
| 11  | (predict* or risk or progno* or detect* or identif* or forecasting).mp.                                                                                                                                                                                                                                                                                                                                                                                                                                                                            | 8,898,601                   |
| 12  | or/10-11                                                                                                                                                                                                                                                                                                                                                                                                                                                                                                                                           | 8,898,601                   |
| 13  | survival analysis/                                                                                                                                                                                                                                                                                                                                                                                                                                                                                                                                 | 145,869                     |
| 14  | (time to event or censor* or survival).mp.                                                                                                                                                                                                                                                                                                                                                                                                                                                                                                         | 1,373,208                   |
| 15  | or/13-14                                                                                                                                                                                                                                                                                                                                                                                                                                                                                                                                           | 1,373,208                   |
| 16  | 6 and 9 and 12 and 15                                                                                                                                                                                                                                                                                                                                                                                                                                                                                                                              | 866                         |

**Table S3.** Studies excluded at full text screening stage

| No. | Title                                                                                                                                                                                                    | Authors                                                                                                                                                                                | Year of publication | Journal                                          | DOI                                                                                                                     | Notes                                    |
|-----|----------------------------------------------------------------------------------------------------------------------------------------------------------------------------------------------------------|----------------------------------------------------------------------------------------------------------------------------------------------------------------------------------------|---------------------|--------------------------------------------------|-------------------------------------------------------------------------------------------------------------------------|------------------------------------------|
| 1.  | Lifetime vs 10-year Cardiovascular Disease Prediction in Young Adults Using Statistical Machine Learning and Deep Learning: The CARDIA Study                                                             | Ambale-Venkatesh, B.; Nguyen, H. T.; Reis, J. P.; Wu, C. O.; Carr, J. J.; Nwabuo, C.; Gidding, S. S.; Guallar, E.; Lima, J. A. C.                                                      | 2022                | medRxiv                                          | <a href="https://dx.doi.org/10.1101/2022.09.22.22280254">https://dx.doi.org/10.1101/2022.09.22.22280254</a>             | Unpublished work/preprint                |
| 2.  | Using machine learning methods to identify predictors of incident myocardial infarction in the women's health initiative cohort                                                                          | Avram, R.; Tison, G.; Nah, G.; Howard, B. V.; Olgin, J.; Parikh, N. I.                                                                                                                 | 2018                | Circulation                                      |                                                                                                                         | Conference abstract                      |
| 3.  | Machine learning for time-to-event analysis in patients with suspected coronary artery disease: increased long-term prognostic value of coronary CT angiography-derived measures and clinical parameters | Bauer, M. J.; Nano, N.; Adolf, R.; Will, A.; Hendrich, E.; Martinoff, S.; Hadamitzky, M.                                                                                               | 2022                | Insights into Imaging                            | <a href="https://dx.doi.org/10.1186/s13244-022-01337-x">https://dx.doi.org/10.1186/s13244-022-01337-x</a>               | Conference abstract                      |
| 4.  | A novel risk prediction model of atrial fibrillation: The multi-ethnic study of atherosclerosis (MESA)                                                                                                   | Bundy, J. D.; Heckbert, S. R.; Chen, L. Y.; Lloyd-Jones, D. M.; Greenland, P.                                                                                                          | 2018                | Circulation                                      |                                                                                                                         | Wrong outcome                            |
| 5.  | Associations of Inflammation with Risk of Cardiovascular and All-Cause Mortality in Adults with Hypertension: An Inflammatory Prognostic Scoring System                                                  | Cheang, I.; Zhu, X.; Lu, X.; Yue, X.; Tang, Y.; Gao, R.; Liao, S.; Yao, W.; Zhou, Y.; Zhang, H.; Yiu, K. H.; Li, X.                                                                    | 2022                | Journal of Inflammation Research                 | <a href="https://dx.doi.org/10.2147/JIR.S384977">https://dx.doi.org/10.2147/JIR.S384977</a>                             | Not intended for prediction              |
| 6.  | Machine learning can predict survival of patients with heart failure from serum creatinine and ejection fraction alone                                                                                   | Chicco, Davide; Jurman, Giuseppe                                                                                                                                                       | 2020                | BMC Medical Informatics and Decision Making      | <a href="https://dx.doi.org/10.1186/s12911-020-1023-5">https://dx.doi.org/10.1186/s12911-020-1023-5</a>                 | Wrong outcome                            |
| 7.  | Machine learning to predict the long-term risk of myocardial infarction and cardiac death based on clinical risk, coronary calcium and epicardial adipose tissue: A prospective study                    | Commandeur, F. C.; Slomka, P. J.; Goeller, M.; Chen, X.; Cadet, S.; Razipour, A.; Gransar, H.; Cantu, S.; Miller, R.; Rozanski, A.; Achenbach, S.; Tamarappoo, B.; Berman, D.; Dey, D. | 2019                | European Heart Journal                           | <a href="https://dx.doi.org/10.1093/eurheartj/ehz747.0002">https://dx.doi.org/10.1093/eurheartj/ehz747.0002</a>         | Conference abstract                      |
| 8.  | Atherosclerotic cardiovascular events prediction using machine learning models: Results from action to control cardiovascular risk in diabetes trial                                                     | Fan, W.                                                                                                                                                                                | 2020                | Circulation                                      | <a href="https://dx.doi.org/10.1161/circ.141.suppl-1.MP58">https://dx.doi.org/10.1161/circ.141.suppl-1.MP58</a>         | Not a ML technique for survival outcomes |
| 9.  | Machine learning-based prediction of 1-year mortality for acute coronary syndrome                                                                                                                        | Hadanny, Amir; Shouval, Roni; Wu, Jianhua; Gale, Chris P.; Unger, Ron; Zahger, Doron; Gottlieb, Shmuel; Matetzky, Shlomi; Goldenberg, Ilan; Beigel, Roy; Iakobishvili, Zaza            | 2022                | Journal of cardiology                            | <a href="https://dx.doi.org/10.1016/j.jicc.2021.11.006">https://dx.doi.org/10.1016/j.jicc.2021.11.006</a>               | Wrong outcome                            |
| 10. | Cardiovascular risk stratification through deep neural survival networks - the multi-ethnic study of atherosclerosis (MESA)                                                                              | Hathaway, Q.; Yanamala, N.; Budoff, M.; Sengupta, P.; Zeby, I.                                                                                                                         | 2021                | Journal of the American College of Cardiology    | <a href="https://dx.doi.org/10.1016/S0735-1097%2821%2901920-3">https://dx.doi.org/10.1016/S0735-1097%2821%2901920-3</a> | Conference abstract                      |
| 11. | PMHnet-alpha: Development and validation of a neural network based discrete-time survival model for mortality prediction in ischemic heart disease                                                       | Holm, P.; Haue, A. D.; Westergaard, D.; Banasik, K.; Koeber, L.; Brunak, S.; Bundgaard, H.                                                                                             | 2022                | European Respiratory Journal                     | <a href="https://dx.doi.org/10.1093/eurheartj/ehac544.2785">https://dx.doi.org/10.1093/eurheartj/ehac544.2785</a>       | Conference abstract                      |
| 12. | Identifying important risk factors for survival in patient with systolic heart failure using random survival forests                                                                                     | Hsieh, E.; Gorodeski, E. Z.; Blackstone, E. H.; Ishwaran, H.; Lauer, M. S.                                                                                                             | 2011                | Circulation: Cardiovascular Quality and Outcomes | <a href="https://dx.doi.org/10.1161/CIRCOUTCOMES.110.939371">https://dx.doi.org/10.1161/CIRCOUTCOMES.110.939371</a>     | Wrong outcome                            |
| 13. | Predictors of Major Adverse Cardiovascular Events Among Type 2 Diabetes Mellitus Patients: A Machine Learning Time-to-Event Analysis                                                                     | Icten, Z.; Friedman, M.; Menzin, J.                                                                                                                                                    | 2022                | Value in Health                                  | <a href="https://dx.doi.org/10.1016/j.jval.2022.04.032">https://dx.doi.org/10.1016/j.jval.2022.04.032</a>               | Conference abstract                      |

|     |                                                                                                                                                 |                                                                                                                                                                                                                         |      |                                                                                  |                                                                                                                   |                                          |
|-----|-------------------------------------------------------------------------------------------------------------------------------------------------|-------------------------------------------------------------------------------------------------------------------------------------------------------------------------------------------------------------------------|------|----------------------------------------------------------------------------------|-------------------------------------------------------------------------------------------------------------------|------------------------------------------|
| 14. | Prognostic Implications of Coronary CT Angiography: 12-Year Follow-Up of 6892 Patients                                                          | Johnson, Kevin M.; Dowe, David A.                                                                                                                                                                                       | 2020 | American journal of roentgenology                                                | <a href="https://dx.doi.org/10.2214/AJR.19.22578">https://dx.doi.org/10.2214/AJR.19.22578</a>                     | Not a ML technique for survival outcomes |
| 15. | Deep learning survival analysis enhances the value of hybrid PET/CT for long-term cardiovascular event prediction                               | Juarez-Orozco, L. E.; Benjamins, J. W.; Maaniitty, T.; Saraste, A.; Van Der Harst, P.; Knuuti, J.                                                                                                                       | 2019 | EUROPEAN HEART JOURNAL                                                           | <a href="https://dx.doi.org/10.1093/eurheartj/ehz748.0177">https://dx.doi.org/10.1093/eurheartj/ehz748.0177</a>   | Conference abstract                      |
| 16. | Outcome predictions using machine learning in atrial fibrillation-related stroke                                                                | Jung, J. M.; Jeon, E. T.                                                                                                                                                                                                | 2021 | Circulation                                                                      | <a href="https://dx.doi.org/10.1161/circ.144.suppl-1.11932">https://dx.doi.org/10.1161/circ.144.suppl-1.11932</a> | Conference abstract                      |
| 17. | Comparing data-driven 10-year cardiovascular disease risk prediction using boosted regression trees to a mainstreamed risk prediction algorithm | Ka Chun Tsang, K. C.; Norberg, M.; Naslund, U.; Weinehall, L.; Carlberg, B.; Wennberg, P.; Ng, N.; Lindahl, B.; Rocklov, J.                                                                                             | 2017 | European Journal of Preventive Cardiology                                        | -                                                                                                                 | Conference abstract                      |
| 18. | A simple risk score to predict mortality for patients with heart failure with preserved ejection fraction-a report from the chart-2 study       | Kasahara, S.; Sakata, Y.; Nochioka, K.; Abe, R.; Oikawa, T.; Sato, M.; Aoyanagi, H.; Shiroto, T.; Takahashi, J.; Miyata, S.; Shimokawa, H.                                                                              | 2017 | Circulation                                                                      | -                                                                                                                 | Wrong outcome                            |
| 19. | Development of a simple risk score to predict mortality of patients with chronic heart failure with preserved ejection fraction                 | Kasahara, S.; Sakata, Y.; Nochioka, K.; Abe, R.; Oikawa, T.; Sato, M.; Shiroto, T.; Takahashi, J.; Miyata, S.; Shimokawa, H.                                                                                            | 2017 | Journal of Cardiac Failure                                                       | <a href="https://dx.doi.org/10.1016/j.cardfail.2017.08.277">https://dx.doi.org/10.1016/j.cardfail.2017.08.277</a> | Not intended for prediction              |
| 20. | Identification of Risk Factors for Mortality after Myocardial Infarction Using Machine Learning Methods                                         | Kashirina, I. L.; Firyulina, M. A.; Bondarenko, Y. V.; Desyatirikova, E. N.; Efimova, O. E.; Chemenkaya, L. V.                                                                                                          | 2021 | International Conference on Soft Computing and Measurements (SCM)                | <a href="https://doi.org/10.1109/SCM52931.2021.9507190">https://doi.org/10.1109/SCM52931.2021.9507190</a>         | Wrong outcome                            |
| 21. | Use of machine learning to predict drivers of incident heart failure in patients with type 2 diabetes mellitus                                  | Kaur, N.; Pellicori, P.; Deligianni, F.; Clelland, J. G. F.                                                                                                                                                             | 2023 | Heart                                                                            | <a href="https://dx.doi.org/10.1136/heartjnl-2023-BCS.140">https://dx.doi.org/10.1136/heartjnl-2023-BCS.140</a>   | Conference abstract                      |
| 22. | Machine learning-based approach for predicting post-treatment survival for patients with coronary artery disease                                | Khalafbeigi, A.; Kalmady, S.; Baaney, K.; Welsh, R.; Kaul, P.; Greiner, R.                                                                                                                                              | 2023 | Canadian Journal of Cardiology                                                   | <a href="https://dx.doi.org/10.1016/j.cjca.2023.06.328">https://dx.doi.org/10.1016/j.cjca.2023.06.328</a>         | Conference abstract                      |
| 23. | An integrated machine learning approach to stroke prediction                                                                                    | Khosla, A.; Cao, Y.; Lin, C. C. Y.; Chiu, H. K.; Hu, J.; Lee, H.                                                                                                                                                        | 2010 |                                                                                  | <a href="https://dx.doi.org/10.1145/1835804.1835830">https://dx.doi.org/10.1145/1835804.1835830</a>               | Conference abstract                      |
| 24. | Predicting survival in heart failure: a risk score based on machine-learning and change point algorithm                                         | Kim, Wonse; Park, Jin Joo; Lee, Hae-Young; Kim, Kye Hun; Yoo, Byung-Su; Kang, Seok-Min; Baek, Sang Hong; Jeon, Eun-Seok; Kim, Jae-Joong; Cho, Myeong-Chan; Chae, Shung Chull; Oh, Byung-Hee; Kook, Woong; Choi, Dong-Ju | 2021 | Clinical research in cardiology : official journal of the German Cardiac Society | <a href="https://dx.doi.org/10.1007/s00392-021-01870-7">https://dx.doi.org/10.1007/s00392-021-01870-7</a>         | Wrong outcome                            |
| 25. | Use of neural networks in predicting the risk of coronary artery disease                                                                        | Lapuerta, P.; Azen, S. P.; LaBree, L.                                                                                                                                                                                   | 1995 | Computers and biomedical research                                                | -                                                                                                                 | Not a ML technique for survival outcomes |



|     |                                                                                                                                                                                     |                                                                                                                                                                                                                                                                                                                                                                                                                                                                       |      |                                                            |                                                                                                                   |                                          |
|-----|-------------------------------------------------------------------------------------------------------------------------------------------------------------------------------------|-----------------------------------------------------------------------------------------------------------------------------------------------------------------------------------------------------------------------------------------------------------------------------------------------------------------------------------------------------------------------------------------------------------------------------------------------------------------------|------|------------------------------------------------------------|-------------------------------------------------------------------------------------------------------------------|------------------------------------------|
| 26. | Machine learning-based models to predict one-year mortality among Chinese older patients with coronary artery disease combined with impaired glucose tolerance or diabetes mellitus | Li, Yan; Guan, Lixun; Ning, Chaoxue; Zhang, Pei; Zhao, Yali; Liu, Qiong; Ping, Ping; Fu, Shihui                                                                                                                                                                                                                                                                                                                                                                       | 2023 | Cardiovascular Diabetology                                 | <a href="https://dx.doi.org/10.1186/s12933-023-01854-z">https://dx.doi.org/10.1186/s12933-023-01854-z</a>         | Wrong outcome                            |
| 27. | Cardiovascular risk prediction using machine learning in a large Japanese cohort                                                                                                    | Matheson, M. B.; Kato, Y.; Baba, S.; Cox, C.; Lima, J. A.; Venkatesh, B. A.                                                                                                                                                                                                                                                                                                                                                                                           | 2021 | Circulation                                                | <a href="https://dx.doi.org/10.1161/circ.143.suppl_1.011">https://dx.doi.org/10.1161/circ.143.suppl_1.011</a>     | Conference abstract                      |
| 28. | Predictive modeling of hospital mortality for patients with heart failure by using an improved random survival forest                                                               | Miao, F.; Cai, Y. P.; Zhang, Y. X.; Fan, X. M.; Li, Y.                                                                                                                                                                                                                                                                                                                                                                                                                | 2018 | IEEE Access                                                | <a href="https://dx.doi.org/10.1109/ACCESS.2018.2789898">https://dx.doi.org/10.1109/ACCESS.2018.2789898</a>       | Wrong outcome                            |
| 29. | A machine learning-based model to predict the 15-year risk for cardiovascular disease in a cohort of people living with HIV                                                         | Muccini, C.; Masci, C.; Corso, F.; Galli, L.; Poli, A.; Ranzenigo, M.; Monardo, R.; Paganoni, A. M.; Castagna, A.; Leva, F.                                                                                                                                                                                                                                                                                                                                           | 2021 | HIV Medicine                                               | <a href="https://dx.doi.org/10.1111/hiv.13183">https://dx.doi.org/10.1111/hiv.13183</a>                           | Conference abstract                      |
| 30. | Risk factor structure of heart failure in patients with cancer after treatment with anticancer agents' assessment by big data from a Japanese electronic health record              | Nohara, Shoichiro; Ishii, Kazuo; Shibata, Tatsuhiro; Obara, Hitoshi; Miyamoto, Takanobu; Ueno, Takafumi; Kakuma, Tatsuyuki; Fukumoto, Yoshihiro                                                                                                                                                                                                                                                                                                                       | 2023 | Heart and Vessels                                          | <a href="https://dx.doi.org/10.1007/s00380-023-02238-9">https://dx.doi.org/10.1007/s00380-023-02238-9</a>         | Not intended for prediction              |
| 31. | Cardiovascular Disease Risk Prediction by Random Survival Forest: The Korean National Health Insurance Service-National Health Screening Cohort                                     | Park, S.; Ratcliffe, S.; Bowles, K.; Ulrich, C. M.                                                                                                                                                                                                                                                                                                                                                                                                                    | 2023 | Circulation                                                | <a href="https://dx.doi.org/10.1161/circ.148.suppl_1.15002">https://dx.doi.org/10.1161/circ.148.suppl_1.15002</a> | Conference abstract                      |
| 32. | Predictors of hospitalization or death due to heart failure in diabetic patients by gender in the accord trial using random survival forests                                        | Patel, T.; Shamsuzzaman, M.; Wu, C.; Almario, E. N.; Tesfaldet, B.; Fleg, J.; Csako, G.; Gandotra, C.; Sopko, G.; Svinglin, H.; Coady, S.; Burkhart, K.; Calis, K.; Cooper, L.; Amin, N.; Banerjee, A.; Farooque, N.; Taylor, A.; Gupta, S.; Dodge, A.; Dandi, G.; Hoque, L.; Fennessy, M.; Raman, S.; Kirby, R.; Chen, J.; Yan, Y.; Liu, L.; Leifer, E.; Chang, H.; Cure, C.; Desvigne-Nickens, P.; Szarfman, A.; Domanski, M.; Pucino, F.; Rosenberg, Y.; Hasan, A. | 2017 | Circulation                                                | -                                                                                                                 | Conference abstract                      |
| 33. | Machine-learning score using stress CMR and CCTA for prediction of cardiovascular events in patients with obstructive CAD                                                           | Pezel, T.; Garot, P.; Toupin, S.; Hamzi, K.; Hovasse, T.; Lefevre, T.; Untersee, T.; Sanguineti, F.; Goncalves, T.; Dillinger, J. G.; Bousson, V.; Henry, P.; Garot, J.                                                                                                                                                                                                                                                                                               | 2023 | Archives of Cardiovascular Diseases Supplements            | <a href="https://dx.doi.org/10.1016/j.acvdsp.2023.04.027">https://dx.doi.org/10.1016/j.acvdsp.2023.04.027</a>     | Conference abstract                      |
| 34. | Prediction of Major Adverse Cardiac Events after Myocardial Perfusion Imaging using multi-task deep neural network and time-to-event data                                           | Pieszko, K.; Singh, A.; Killekar, A.; Otaki, Y.; Sharir, T.; Einstein, A. J.; Fish, M. B.; Ruddy, T. D.; Kaufmann, P.; Sinusas, A. J.; Miller, E. J.; Bateman, T. M.; Dorbala, S.; Di Carli, M.; Dey, D.; Liang, J.; Berman, D. S.; Slomka, P. J.                                                                                                                                                                                                                     | 2021 | European Journal of Nuclear Medicine and Molecular Imaging | <a href="https://dx.doi.org/10.1007/s00259-021-05547-1">https://dx.doi.org/10.1007/s00259-021-05547-1</a>         | Conference abstract                      |
| 35. | Convolutional multi-task deep neural network precisely predicts time-dependent survival of major adverse cardiac events after myocardial perfusion imaging                          | Pieszko, K.; Singh, A.; Otaki, Y.; Sharir, T.; Einstein, A. J.; Fish, M. B.; Ruddy, T. D.; Kaufmann, P. A.; Sinusas, A. J.; Miller, E. J.; Bateman, T. M.; Dorbala, S.; Di Carli, M.; Dey, D.; Liang, J. X.; Berman, D. S.; Slomka, P. J.                                                                                                                                                                                                                             | 2021 | Journal of Nuclear Cardiology                              | <a href="https://dx.doi.org/10.1007/s12350-021-02760-1">https://dx.doi.org/10.1007/s12350-021-02760-1</a>         | Conference abstract                      |
| 36. | An Explainable Transformer-Based Deep Learning Model for the Prediction of Incident Heart Failure                                                                                   | Rao, S.; Li, Y.; Ramakrishnan, R.; Hassaine, A.; Canoy, D.; Cleland, J.; Lukasiewicz, T.; Salimi-Khorshidi, G.; Rahimi, K.                                                                                                                                                                                                                                                                                                                                            | 2022 | IEEE Journal of Biomedical and Health Informatics          | <a href="https://dx.doi.org/10.1109/JBHI.2022.3148820">https://dx.doi.org/10.1109/JBHI.2022.3148820</a>           | Not a ML technique for survival outcomes |

|     |                                                                                                                                                                                  |                                                                                                                                                                                                                                               |      |                                                            |                                                                                                                           |                                          |
|-----|----------------------------------------------------------------------------------------------------------------------------------------------------------------------------------|-----------------------------------------------------------------------------------------------------------------------------------------------------------------------------------------------------------------------------------------------|------|------------------------------------------------------------|---------------------------------------------------------------------------------------------------------------------------|------------------------------------------|
| 37. | Predictive performance of machine learning models for detection of incident heart failure using multicentre data                                                                 | Sabovcik, F.; Ntalianis, E.; Cauwenberghs, N.; Kuznetsova, T.                                                                                                                                                                                 | 2022 | Journal of Hypertension                                    | <a href="https://dx.doi.org/10.1097/01.hjh.0000835320.43093.76">https://dx.doi.org/10.1097/01.hjh.0000835320.43093.76</a> | Conference abstract                      |
| 38. | A novel risk prediction score for incident heart failure among patients with diabetes                                                                                            | Segar, M. W.; Patel, K. V.; Berry, J. D.; Pandey, A.                                                                                                                                                                                          | 2019 | Circulation                                                | <a href="https://dx.doi.org/10.1161/circ.139.suppl_1.P378">https://dx.doi.org/10.1161/circ.139.suppl_1.P378</a>           | Conference abstract                      |
| 39. | Model Complexity and Explainability in Prediction for Coronary Artery Disease in the UK Biobank                                                                                  | Sharapova, N.; Maxwell, J. M.; Hagenaars, S. P.; Russell, R. A.; Ibrahim, Z. M.; Lewis, C. M.                                                                                                                                                 | 2022 | Genetic Epidemiology                                       | <a href="https://dx.doi.org/10.1002/gepi.22503">https://dx.doi.org/10.1002/gepi.22503</a>                                 | Conference abstract                      |
| 40. | Predicting ischemic stroke and all-cause mortality risk in patients with heart failure with reduced ejection fraction and sinus rhythm: A secondary analysis of the warcef trial | Sharma, R.; Krumholz, H. M.; Sheth, K. N.; Faridi, K.; Kamel, H.; Merkler, A. E.                                                                                                                                                              | 2022 | Stroke                                                     | <a href="https://dx.doi.org/10.1161/str.53.suppl_1.TP188">https://dx.doi.org/10.1161/str.53.suppl_1.TP188</a>             | Conference abstract                      |
| 41. | Predicting major adverse cardiac events with cox neural networks: results from the refine spect registry                                                                         | Slomka, P.; Betancur, J.; Otaki, Y.; Commandeur, F.; Sharir, T.; Einstein, A.; Fish, M.; Ruddy, T.; Kaufmann, P. A.; Sinusas, A.; Miller, E.; Bateman, T.; Dorbala, S.; Di Carli, M.; Diniz, M.; Germano, G.; Dey, D.; Cooper, L.; Berman, D. | 2019 | Journal of the American College of Cardiology              | <a href="https://dx.doi.org/10.1016/S0735-1097%2819%2932038-8">https://dx.doi.org/10.1016/S0735-1097%2819%2932038-8</a>   | Conference abstract                      |
| 42. | ASCVD Risk Score vs Machine Learning-Based Algorithm in the Prediction of ASCVD Events in Women With Breast Cancer                                                               | Stabellini, N.; Blumenthal, R. S.; Bittencourt, M. S.; Whelton, S. P.; Leong, D.; Moore, J.; Cullen, J.; Nain, P.; Shanahan, J.; Dent, S. F.; Montero, A.; Guha, A.                                                                           | 2023 | Circulation                                                | <a href="https://dx.doi.org/10.1161/circ.148.suppl_1.14810">https://dx.doi.org/10.1161/circ.148.suppl_1.14810</a>         | Not intended for prediction              |
| 43. | Prognostication of Incidence and Severity of Ischemic Stroke in Hot Dry Climate From Environmental and Non-Environmental Predictors                                              | Statsenko, Y.; Habuza, T.; Fursa, E.; Ponomareva, A.; Almansoori, T. M.; Zahmi, F. A.; Gorkom, K. N. V.; Laver, V.; Talako, T.; Szolics, M.; Dehdashtian, A.; Koteesh, J. A.; Ljubicavljjevic, M.                                             | 2022 | IEEE Access                                                | <a href="https://dx.doi.org/10.1109/ACCESS.2022.23175302">https://dx.doi.org/10.1109/ACCESS.2022.23175302</a>             | Not a ML technique for survival outcomes |
| 44. | Use of Machine Learning and Prediction Tools to Assess Cardiovascular Disease Risk in Obstructive Sleep Apnea                                                                    | Suarez-Farinas, M.; Cohen, O.; Al-Taie, Z.; Khan, S.; Nadkarni, G.; Barbe, F.; Sanchez-de-la-Torre, M.; Shah, N. A.                                                                                                                           | 2023 | American Journal of Respiratory and Critical Care Medicine | <a href="https://dx.doi.org/10.1164/ajrccm-conference.2023.C98">https://dx.doi.org/10.1164/ajrccm-conference.2023.C98</a> | Conference abstract                      |
| 45. | Prediction of 30-day mortality in heart failure patients with hypoxic hepatitis: Development and external validation of an interpretable machine learning model                  | Sun, R.; Wang, X.; Jiang, H.; Yan, Y.; Dong, Y.; Yan, W.; Luo, X.; Miu, H.; Qi, L.; Huang, Z.                                                                                                                                                 | 2022 | Frontiers in Cardiovascular Medicine                       | <a href="https://dx.doi.org/10.3389/fcvm.2022.1035675">https://dx.doi.org/10.3389/fcvm.2022.1035675</a>                   | Wrong outcome                            |
| 46. | Identifying novel predictors for incident heart failure using statistical learning techniques in the women's health initiative (WHI) cohort                                      | Tison, G. H.; Nah, G.; Olgin, J. E.; Vittinghoff, E.; Howard, B. V.; Foraker, R.; Allison, M. A.; Casanova, R. L.; Blair, R. H.; Breathett, K. K.; Klein, L.; Parikh, N. I.                                                                   | 2016 | Circulation                                                | -                                                                                                                         | Not intended for prediction              |
| 47. | Cardiovascular Risk Assessment Using Artificial Intelligence-Enabled Event Adjudication and Hematologic Predictors                                                               | Truslow, James G.; Goto, Shinichi; Homilius, Max; Mow, Christopher; Higgins, John M.; MacRae, Calum A.; Deo, Rahul C.                                                                                                                         | 2022 | Circulation. Cardiovascular quality and outcomes           | <a href="https://dx.doi.org/10.1016/S0735-1097%2819%2931298-7">https://dx.doi.org/10.1016/S0735-1097%2819%2931298-7</a>   | Not intended for prediction              |
| 48. | Machine Learning Models to Predict Development of CKD and/or HF in Early Stages of Type 2 Diabetes Patients                                                                      | Tsubota, H.; Yajima, T.; Kanda, E.; Kanemata, S.; Suzuki, A.; Shirakawa, K.; Makino, M.                                                                                                                                                       | 2022 | Circulation                                                | <a href="https://dx.doi.org/10.1161/circ.146.suppl_1.11780">https://dx.doi.org/10.1161/circ.146.suppl_1.11780</a>         | Wrong outcome                            |
| 49. | Machine learning to predict cardiometabolic outcomes in people living with overweight and obesity                                                                                | Turchin, A.; Morrison, F.; Shubina, M.; Shinde, S.; Ahmad, N.; Kan, H.                                                                                                                                                                        | 2021 | Obesity                                                    | <a href="https://dx.doi.org/10.1002/oby.23328">https://dx.doi.org/10.1002/oby.23328</a>                                   | Conference abstract                      |

|     |                                                                                                                                                                                               |                                                                                                                                                                                                                                                                          |      |                                                    |                                                                                                                         |                                          |
|-----|-----------------------------------------------------------------------------------------------------------------------------------------------------------------------------------------------|--------------------------------------------------------------------------------------------------------------------------------------------------------------------------------------------------------------------------------------------------------------------------|------|----------------------------------------------------|-------------------------------------------------------------------------------------------------------------------------|------------------------------------------|
| 50. | Interpretable prediction of 3-year all-cause mortality in patients with heart failure caused by coronary heart disease based on machine learning and SHAP                                     | Wang, K.; Tian, J.; Zheng, C.; Yang, H.; Ren, J.; Liu, Y.; Han, Q.; Zhang, Y.                                                                                                                                                                                            | 2021 | Computers in Biology and Medicine                  | <a href="https://dx.doi.org/10.1016/j.compbiomed.2021.104813">https://dx.doi.org/10.1016/j.compbiomed.2021.104813</a>   | Wrong outcome                            |
| 51. | Improving the Prediction of Death from Cardiovascular Causes with Multiple Risk Markers                                                                                                       | Wang, X.; Bakulski, K. M.; Fansler, S.; Mukherjee, B.; Park, S. K.                                                                                                                                                                                                       | 2023 | medRxiv                                            | <a href="https://dx.doi.org/10.1101/2023.01.21.23284863">https://dx.doi.org/10.1101/2023.01.21.23284863</a>             | Unpublished research work                |
| 52. | Risk stratification for mortality in cardiovascular disease survivors: A survival conditional inference tree analysis                                                                         | Wu, Zhijun; Huang, Zhe; Wu, Yuntao; Jin, Yao; Wang, Yanxiu; Zhao, Haiyan; Chen, Shuohua; Wu, Shouling; Gao, Xiang                                                                                                                                                        | 2021 | Nutrition, metabolism, and cardiovascular diseases | <a href="https://dx.doi.org/10.1016/j.numecd.2020.09.029">https://dx.doi.org/10.1016/j.numecd.2020.09.029</a>           | Wrong outcome                            |
| 53. | Gender and Age Specific Baseline Predictors of MACE in PEACE Trial Identified by Machine Learning                                                                                             | Xin, V.; Hayashi, S.; Husain, A.; Hasan, A. A.; Dey, A.; Banerjee, A.; Atkinson, I.; Dandi, G.; Qureshi, K.; Lewis, N.; Mahmood, N.; Hasan, N.; Haq, N.; Gani, N.; Mallick, Z.; Rosenberg, Y. D.                                                                         | 2020 | Circulation                                        | <a href="https://dx.doi.org/10.1161/circ.142.suppl_3.16998">https://dx.doi.org/10.1161/circ.142.suppl_3.16998</a>       | Not intended for prediction              |
| 54. | Machine learning to predict the long-term risk of myocardial infarction and cardiac death based on clinical risk, coronary calcium, and epicardial adipose tissue: a prospective study        | Commandeur, F.; Slomka, P. J.; Goeller, M.; Chen, X.; Cadet, S.; Razipour, A.; McElhinney, P.; Gransar, H.; Cantu, S.; Miller, R. J. H.; Rozanski, A.; Achenbach, S.; Tamarappoo, B. K.; Berman, D. S.; Dey, D.                                                          | 2020 | Cardiovascular Research                            | <a href="https://dx.doi.org/10.1093/cvr/cvz321">https://dx.doi.org/10.1093/cvr/cvz321</a>                               | Not a ML technique for survival outcomes |
| 55. | Predicting Cardiovascular Disease Mortality: Leveraging Machine Learning for Comprehensive Assessment of Health and Nutrition Variables                                                       | Martin-Morales, A.; Yamamoto, M.; Inoue, M.; Vu, T.; Dawadi, R.; Araki, M.                                                                                                                                                                                               | 2023 | Nutrients                                          | <a href="https://dx.doi.org/10.3390/nu15183937">https://dx.doi.org/10.3390/nu15183937</a>                               | Not a ML technique for survival outcomes |
| 56. | Development and Validation of Machine Learning-Based Race-Specific Models to Predict 10-Year Risk of Heart Failure A Multicohort Analysis                                                     | Segar, M. W.; Jaeger, B. C.; Patel, K. V.; Nambi, V.; Ndumele, C. E.; Correa, A.; Butler, J.; Chandra, A.; Ayers, C.; Rao, S.; Lewis, A. A.; Raffield, L. M.; Rodriguez, C. J.; Michos, E. D.; Ballantyne, C. M.; Hall, M. E.; Mentz, R. J.; de Lemos, J. A.; Pandey, A. | 2021 | Circulation                                        | <a href="https://dx.doi.org/10.1161/circulationaha.120.053134">https://dx.doi.org/10.1161/circulationaha.120.053134</a> | Duplicate                                |
| 57. | Machine Learning-Based Models Incorporating Social Determinants of Health vs Traditional Models for Predicting In-Hospital Mortality in Patients With Heart Failure                           | Segar, M. W.; Hall, J. L.; Jhund, P. S.; Powell-Wiley, T. M.; Morris, A. A.; Kao, D.; Fonarow, G. C.; Hernandez, R.; Ibrahim, N. E.; Rutan, C.; Navar, A. M.; Stevens, L. M.; Pandey, A.                                                                                 | 2022 | Jama Cardiology                                    | <a href="https://dx.doi.org/10.1001/jamacardio.2022.1900">https://dx.doi.org/10.1001/jamacardio.2022.1900</a>           | Wrong outcome                            |
| 58. | Comment on Segar et al. Machine Learning to Predict the Risk of Incident Heart Failure Hospitalization Among Patients With Diabetes: The WATCH-DM Risk Score. Diabetes Care 2019;42:2298-2306 | Shao, H.; Shi, L. Z.; Fonseca, V.                                                                                                                                                                                                                                        | 2020 | Diabetes Care                                      | <a href="https://dx.doi.org/10.2337/dc19-1891">https://dx.doi.org/10.2337/dc19-1891</a>                                 | Letter                                   |
| 59. | Using machine learning to predict adverse events in acute coronary syndrome: A retrospective study                                                                                            | Song, L.; Li, Y.; Nie, S. S.; Feng, Z. Y.; Liu, Y. X.; Ding, F. F.; Gong, L. Y.; Liu, L. M.; Yang, G. P.                                                                                                                                                                 | 2023 | Clinical Cardiology                                | <a href="https://dx.doi.org/10.1002/clc.24127">https://dx.doi.org/10.1002/clc.24127</a>                                 | Not a ML technique for survival outcomes |
| 60. | Analyzing and predicting the risk of death in stroke patients using machine learning                                                                                                          | Zhu, E. Z.; Chen, Z. H.; Ai, P.; Wang, J. Y.; Zhu, M.; Xu, Z. Q.; Liu, J.; Ai, Z. S.                                                                                                                                                                                     | 2023 | Frontiers in Neurology                             | <a href="https://dx.doi.org/10.3389/fneur.2023.1096153">https://dx.doi.org/10.3389/fneur.2023.1096153</a>               | Wrong outcome                            |
| 61. | Deep phenotyping and prediction of long-term heart failure by machine learning                                                                                                                | Zhuang, X.; Sun, X.; Zhong, X.; Zhou, H.; Zhang, S.; Liao, X.                                                                                                                                                                                                            | 2019 | Journal of the American College of Cardiology      | <a href="https://dx.doi.org/10.1016/S0735-1097%2819%2931298-7">https://dx.doi.org/10.1016/S0735-1097%2819%2931298-7</a> | Duplicate                                |

**Table S4.** Characteristics of the studies included in the systematic review.

| Author and year           | Journal                               | Population                                                                              | Study region (country) | Setting     | Length of follow up                           | End point (predicted outcome) | Sample size | Age                                                      | Gender (% women) | Event (%)                                                | End point definition                                                                                                                                                                                                                                                                                                                                                                                                                                                                                                                                                                                                                                                       |
|---------------------------|---------------------------------------|-----------------------------------------------------------------------------------------|------------------------|-------------|-----------------------------------------------|-------------------------------|-------------|----------------------------------------------------------|------------------|----------------------------------------------------------|----------------------------------------------------------------------------------------------------------------------------------------------------------------------------------------------------------------------------------------------------------------------------------------------------------------------------------------------------------------------------------------------------------------------------------------------------------------------------------------------------------------------------------------------------------------------------------------------------------------------------------------------------------------------------|
| Ambale-Venkatesh 2017 (1) | Circulation research                  | Participants free of clinical CVD at baseline. (MESA cohort)                            | United States          | Community   | Median (IQR) in year: 11.2 (10.6–11.7)        | CVD, CHD Stroke, and HF       | 6,814       | Mean (SD) age in year: 62.15 (10.23)                     | 53.0%            | CVD: 10.42%; CHD: 7.31%; Stroke: 2.94%; and HF: 3.80%    | CVD represented a composite of CVD death, stroke, and CHD. CHD included any of MI, resuscitated cardiac arrest, definite angina, probable angina followed by revascularization, and CHD death. Stroke was defined as rapid onset of a documented focal neurological deficit (vascular causes) lasting 24 hours or until death, or if <24 hours, when there was a clinically relevant brain lesion. HF included symptomatic HF diagnosed by a physician and patient receiving medical treatment for HF, in addition to (1) pulmonary edema/ congestion, and (2) dilated ventricle or poor left ventricular function, or evidence of left ventricular diastolic dysfunction. |
| Barbieri 2022 (2)         | International Journal of Epidemiology | Participants with no history of CVD or heart failure (administrative data)              | New Zealand            | Community   | Mean: 4.8 years in women and 4.7 years in men | Fatal or non-fatal CVD        | 2,164, 872  | Mean age (SD) in year: 49.0 (11.8) in both men and women | 52.7%            | Fatal and non-fatal CVD: 2.1% for women and 3.7% for men | A CVD event was defined as hospitalisation with a discharge diagnosis code consistent with CVD or heart failure. A death was classified as a CVD death if the underlying cause is either cardiac arrest, ischemic heart disease, coronary procedure, stroke, peripheral vascular disease, or congestive heart failure.                                                                                                                                                                                                                                                                                                                                                     |
| Bauer 2023 (3)            | Radiology: Cardiothoracic Imaging     | Patients with suspected CAD who underwent Coronary CT Angiography (administrative data) | NR                     | Institution | Median (IQR) in year: 7.3 (4.5–9.8)           | MACE                          | 5,457       | Mean age (SD) in year: 61 (11)                           | 33.2%            | 5.57%                                                    | MACE was defined as the composite of all-cause death, MI, unstable angina, or late revascularization (>90 days after index scan).                                                                                                                                                                                                                                                                                                                                                                                                                                                                                                                                          |
| Blanchard 2022 (4)        | IEEE Access                           | Participants without a history of MACE (IRSR-PLSC cohort)                               | France                 | community   | Median (IQR) in year: 6.0 (3.9–8.7)           | MACE                          | 5,506       | Median age (IQR) in year: 59 (49–69)                     | 39.4%            | 11.13%                                                   | MACE was defined as the first hospitalization due to MI, stroke, exacerbation of congestive heart failure, revascularization procedure (percutaneous coronary intervention, coronary artery                                                                                                                                                                                                                                                                                                                                                                                                                                                                                |

|                     |                                                         |                                                                                                                                                                   |               |             |                                     |                                     |         |                                                                        |        |                         |                                                                                                                                                                                    |
|---------------------|---------------------------------------------------------|-------------------------------------------------------------------------------------------------------------------------------------------------------------------|---------------|-------------|-------------------------------------|-------------------------------------|---------|------------------------------------------------------------------------|--------|-------------------------|------------------------------------------------------------------------------------------------------------------------------------------------------------------------------------|
|                     |                                                         |                                                                                                                                                                   |               |             |                                     |                                     |         |                                                                        |        |                         | bypass graft surgery), or all-cause death.                                                                                                                                         |
| Brester 2023 (5)    | Biostatistics and Epidemiology                          | Middle-aged men, 42–60 years old (KIHD risk factor study)                                                                                                         | Finland       | Community   | Maximum: 30-year                    | CVD mortality                       | 2,682   | Range in year: 42-60                                                   | 0%     | NR                      | CVD mortality referring to codes I00–I99 of the 10th International Classification of Diseases (ICD-10).                                                                            |
| Chhoa 2023 (6)      | Scientific reports                                      | Aged over 18 years were diagnosed with Cerebral autosomal dominant arteriopathy with subcortical infarcts and leukoencephalopathy (administrative data)           | France        | Institution | Maximum: 5-year                     | Stroke or death                     | 422     | NR                                                                     | NR     | 34.12%                  | Time to either ischemic and hemorrhagic strokes or death, whichever occurred first.                                                                                                |
| Chun 2021 (7)       | Journal of the American Medical Informatics Association | Participants without disability aged 35–74 years with no prior history of stroke or TIA at baseline (CKB cohort)                                                  | China         | Community   | Maximum: 9-year                     | Stroke                              | 503,842 | Mean (SD) age in year: 51.9 (10.6)                                     | 59%    | Men: 9.5%; Women: 7.9%. | All fatal and non-fatal stroke cases based on the International Classification of Diseases 10th revision (ICD-10).                                                                 |
| Deng 2023 (8)       | BMC medical research methodology                        | Participants aged 40-79 years who are free of a previous history of MI, stroke, congestive heart failure, or atrial fibrillation. (Lifetime risk pooling project) | United States | Community   | Mean (SD) in year: 10.50 (3.02)     | ASCVD                               | 23,216  | Mean (SD) in year: 57.8 (9.6)                                          | 56.93% | 16%                     | ASCVD was defined as nonfatal MI or CHD death, or fatal or nonfatal stroke                                                                                                         |
| Duan 2024 (9)       | Ecotoxicology and Environmental Safety                  | Adults (aged ≥18 years) (NHANES)                                                                                                                                  | United States | community   | Mean (SD) in year: 7.8 (0.6)        | CVD mortality                       | 1,602   | Mean (SD) in year: 46.33 (18.39)                                       | 48.94% | 2.12%                   | CVD mortality (I00-I09, I11, I13, I20-I51)                                                                                                                                         |
| Farhadian 2021 (10) | BMC Cardiovascular Disorders                            | Adult patients undergoing coronary angioplasty (administrative data)                                                                                              | Iran          | Institution | Mean in year: 8.05                  | MACE                                | 220     | Mean (SD) age in year: 60.00 (11.09)                                   | 31.4%  | 43.7%                   | MACE defined as a composite of All-cause death, coronary artery bypass graft surgery, stroke, and repeat revascularization.                                                        |
| Feng 2022 (11)      | BMC medical research methodology                        | Newly diagnosed hypertensive patients aged 18 to 99 years (administrative data)                                                                                   | Canada        | Institution | Median (IQR) in year: 3.5 (2.2-4.8) | Hospitalisation attributable to CVD | 259,873 | Mean (SD) in year: 56.6 (14.0). Median (IQR) in year: 56.1 (47.2-65.8) | 47.0%  | 4.56%                   | Hospitalisation attributable to as major adverse events; a composite of MI, resuscitated cardiac arrest, congestive heart failure, coronary revascularization, or all-cause death. |
| Gandin 2023 (12)    | PLoS ONE                                                | Adult patients with diabetes Cardiovascular Observatory of Trieste (Italy)                                                                                        | Italy         | Institution | Median in year: 5.4                 | HF                                  | 10,614  | Mean (SD) in year: 72 (11)                                             | 42.0%  | 17.3%                   | HF identified as the first between the following events: diagnosis of HF during hospitalization (ICD-9 codes:                                                                      |

|                           |                                                    |                                                                                                                                           |                   |             |                                        |               |       |                                                              |        |        |                                                                                                                                                                                                                                                                                                                                                                                                                |
|---------------------------|----------------------------------------------------|-------------------------------------------------------------------------------------------------------------------------------------------|-------------------|-------------|----------------------------------------|---------------|-------|--------------------------------------------------------------|--------|--------|----------------------------------------------------------------------------------------------------------------------------------------------------------------------------------------------------------------------------------------------------------------------------------------------------------------------------------------------------------------------------------------------------------------|
|                           |                                                    |                                                                                                                                           |                   |             |                                        |               |       |                                                              |        |        | 39891, 40201, 40211, 40291, 40401, 40403, 40411, 40413, 40491, 40493, 4280–4284, 4289) and diagnosis of HF based at out-of-hospital clinical examination according to ESC criteria: typical symptoms (breathlessness, ankle swelling and fatigue) and/or signs (elevated jugular venous pressure, pulmonary crackles, and peripheral oedema) in presence of a structural and/or functional cardiac abnormality |
| Gao 2023 (13)             | European radiology                                 | Adult patients diagnosed with HF with reduced ejection fraction ( $\leq 40\%$ ) according to the ACC/AHA guidelines (administrative data) | China             | Institution | Median (IQR) in year: 2.85 (0.58-3.39) | MACE          | 329   | Mean (SD) in year: 54.0 (14.0)                               | 22.8%  | 18.8%  | MACE includes cardiovascular death, rehospitalization because of cardiac dysfunction, and cardiac transplantation.                                                                                                                                                                                                                                                                                             |
| Garcia-Caretero 2019 (14) | Medical and Biological Engineering and Computing   | Adult patients with Hypertension without a history of CVD (administrative data)                                                           | Spain             | Institution | Median in year: 3.5                    | MACE          | 1,471 | Mean (SD) in years: 58.1 (12.8)                              | 49.8%  | 22.43% | MACE was a composite of incident, non-fatal CHD (acute MI), HF, stroke, and cardiovascular death.                                                                                                                                                                                                                                                                                                              |
| Hathaway 2021 (15)        | Computers in Biology and Medicine                  | Multiethnic participants aged 45–84 years old (MESA cohort)                                                                               | United States     | Community   | Maximum: 16-year                       | MACE          | 6,814 | Age range in year: 45–84 (mean age in year: 62.52 SD: 10.19) | 53.29% | 28.4%  | MACE was defined as a composite of MI, resuscitated cardiac arrest, congestive heart failure, coronary revascularization, or all-cause mortality.                                                                                                                                                                                                                                                              |
| Jain 2021 (16)            | Journal of Cardiothoracic and Vascular Anesthesia  | Adult patients undergoing liver transplantation (administrative data)                                                                     | United States     | Institution | Mean (SD) in year: 4.4 (3.3)           | CVD mortality | 1,459 | Median (IQR) in year: 58 (51-64)                             | 66.0%  | 3.2%   | CVD mortality was defined as death attributable to MI, HF, cardiac arrest, or stroke                                                                                                                                                                                                                                                                                                                           |
| Kim 2023 (17)             | Journal of neurology, neurosurgery, and psychiatry | Adult patients with acute ischaemic stroke admitted to a stroke Centre (administrative data)                                              | Republic of Korea | Institution | Maximum: 1 year                        | MACE          | 8,590 | Mean age in year: 71.0                                       | 42.49% | 13.97% | MACE was defined as a composite of recurrent stroke, acute MI or death). Recurrent stroke was defined as the sudden development of a new stroke or worsening of an existing neurologic deficit after AIS, with evidence of attributable new stroke lesions on brain imaging using CT or MRI.                                                                                                                   |

|                          |                                                                   |                                                                                               |                |             |                                     |                  |        |                                  |        |                                                    |                                                                                                                                                                                                                                                                                                                                                                                                                                                                                                                                                                          |
|--------------------------|-------------------------------------------------------------------|-----------------------------------------------------------------------------------------------|----------------|-------------|-------------------------------------|------------------|--------|----------------------------------|--------|----------------------------------------------------|--------------------------------------------------------------------------------------------------------------------------------------------------------------------------------------------------------------------------------------------------------------------------------------------------------------------------------------------------------------------------------------------------------------------------------------------------------------------------------------------------------------------------------------------------------------------------|
| Lin 2023 (18)            | International Journal of Environmental Research and Public Health | Adult patients who had acute ischemic stroke and admitted to a hospital (administrative data) | China (Taiwan) | Institution | Median (IQR) in year: 3.2 (1.4-5.6) | CVD mortality    | 21,463 | Mean (SD) in year: 67.33 (12.93) | 38.15% | The overall incidence rate: 33.7/1000 person-years | CVD were identified using the International Classification of Diseases, 10th revision, codes (ICD-10-CM codes I00–I99).                                                                                                                                                                                                                                                                                                                                                                                                                                                  |
| Mauger 2023 (19)         | Radiology                                                         | Adults with diverse race and ethnicity with no clinically apparent CVD (MESA cohort)          | United States  | Community   | Median: 8.5 years)                  | CVD, HF, and CHD | 4,618  | Mean (SD) in year: 60.6 (9.9)    | 55.0%  | CVD: 10%; HF:3%; CHD: 7%                           | CVD events included stroke, CHD, atherosclerotic death, stroke death, and CVD related death. Criteria for CHD included MI, resuscitated cardiac arrest, definite and probable angina, and CHD death. HF included symptomatic HF diagnosed by a physician and treatment, while definite HF also required evidence of one or more other criteria (including pulmonary edema and/or congestion at chest radiography, a dilated ventricle or poor left ventricular function at echocardiography or ventriculography, or evidence of left ventricular diastolic dysfunction). |
| Moreno-Sánchez 2023 (20) | Frontiers in Cardiovascular Medicine                              | Adult patients who suffered an HF episode (administrative data)                               | Pakistan       | Institution | Mean (SD) in month: 4.3 (2.6)       | HF mortality     | 299    | Mean (SD) in year: 60.83 (11.89) | 35.12% | 32.12%                                             | Death due to HF                                                                                                                                                                                                                                                                                                                                                                                                                                                                                                                                                          |
| Morris 2023 (21)         | PLoS ONE                                                          | Adult population with no history of CVD at baseline (Jackson Heart Study)                     | United States  | Community   | Maximum: 10-year                    | CVD              | 3,980  | Mean (SD) in year: 53.8 (12)     | 64.0%  | 9.6%                                               | CVD events included CHD (i.e., definite or probable MI, definite fatal CHD, cardiac procedures), stroke (definite or probable), and HF.                                                                                                                                                                                                                                                                                                                                                                                                                                  |
| Nguyen 2023 (22)         | BMC medical research methodology                                  | Young adults aged 18-30 years at enrollment (CARDIA)                                          | United States  | Community   | Maximum: 17-year                    | CVD              | 3,539  | Mean in year: 40 (SD 3.6)        | 66.0%  | 5.0%                                               | Incident CVD event included CHD (MI, acute coronary syndrome, or CHD death, including fatal MI), stroke, transient ischemic attack, hospitalization for HF, intervention for peripheral arterial disease, or death from cardiovascular causes.                                                                                                                                                                                                                                                                                                                           |

|                   |                                      |                                                                                                                       |                                                                                                                                  |             |                                        |                                       |                                   |                                                                                |                            |                                                     |                                                                                                                                                                                                                                                                                                                                                                         |
|-------------------|--------------------------------------|-----------------------------------------------------------------------------------------------------------------------|----------------------------------------------------------------------------------------------------------------------------------|-------------|----------------------------------------|---------------------------------------|-----------------------------------|--------------------------------------------------------------------------------|----------------------------|-----------------------------------------------------|-------------------------------------------------------------------------------------------------------------------------------------------------------------------------------------------------------------------------------------------------------------------------------------------------------------------------------------------------------------------------|
| Qian 2023 (23)    | BMC public health                    | People aged 30-74 years free of ASCVD at baseline                                                                     | China                                                                                                                            | Community   | Median in year: 5.79                   | ASCVD                                 | 7,975 (4,054 men; 3,920 women)    | Men (mean (SD)) in year: 44.08(10.85). Women (mean (SD)) in year: 43.31(10.38) | 49.0%                      | 10.19% (7.57% in men and 14.44% in women)           | ASCVD was diagnosed as nonfatal acute MI, death from CHD, or fatal or nonfatal stroke.                                                                                                                                                                                                                                                                                  |
| Ren 2022 (24)     | Frontiers in Cardiovascular Medicine | Adults with diabetic kidney disease with no history of CVD or coronary revascularization (administrative data)        | China                                                                                                                            | Institution | Medium (IQR) in month: 10.4 (3.8–23.4) | CVD                                   | 890                               | Median (IQR) in year: 52 (45-60)                                               | 62.6%                      | 31.91%                                              | First occurrence of a subsequent CVD, including CHD, MI, angina, and coronary revascularization); cerebrovascular disease (hemorrhagic stroke and ischaemic stroke); congestive heart failure and peripheral arterial disease (amputations, aortic aneurysm, revascularization of the aorta or other peripheral arteries) and the combination of cardiovascular events. |
| Rigdon 2019 (25)  | BMJ Open                             | Adults aged 20–79 years with no prior CVD history (NHANES)                                                            | United States                                                                                                                    | Community   | Median in year: 6.6                    | CVD mortality                         | 41,990                            | Mean in year: 50                                                               | 53%                        | 4.0%                                                | CVD mortality was defined as death from heart disease or cerebrovascular diseases.                                                                                                                                                                                                                                                                                      |
| Sabovic 2022 (26) | Frontiers in Cardiovascular Medicine | Adults aged 30-80 years without HF at baseline (HOMAGE meta-data)                                                     | Multiple countries (United Kingdom, Ireland, Nordic countries, Belgium United states, Netherlands, Scotland, Ireland, and Italy) | Community   | Median (IQR) in year: 5.40 (4.28–6.52) | Incident non-fatal HF hospitalisation | 30,354                            | Mean (SD) in year: 66 (9)                                                      | 33.43%                     | 3.52%                                               | Incident non-fatal HF was defined as HF hospitalisation                                                                                                                                                                                                                                                                                                                 |
| Segar 2019 (27)   | Diabetes care                        | Adults (aged 40-70 years) with type 2 diabetes mellitus who had no history of prevalent HF at baseline (ACCORD trial) | United States and Canada                                                                                                         | Institution | Median in year: 4.9                    | Hospitalization or death due to HF    | 8,756                             | Mean (SD) in year: 62.7 (6.6)                                                  | 38.5%                      | 3.6%                                                | Hospitalisation for HF was based on documented clinical and radiologic evidence of clinical HF and congestion. Death due to HF or cardiogenic shock was defined as a death with clinical, radiologic, or postmortem evidence of HF, in the absence of acute ischemic event.                                                                                             |
| Segar 2021 (28)   | Circulation                          | Participants aged >40 years and free of HF at baseline                                                                | United States                                                                                                                    | Community   | 10-year                                | HF                                    | Black adults: 4,141; for external | Mean (SD) in year (Black adults: 58.1 (10.5)-62.4                              | Black adults: 56.8%-64.5%. | Black adults (7.0%; men: 6.7%), women: 7.1%). White | Incident HF events were identified by the first hospitalisation event with HF                                                                                                                                                                                                                                                                                           |



|                      |                                     |                                                                                                                                                    |                   |             |                                                                     |                                               |                                                                                          |                                                                                                                            |                                                                                           |                                                                                                                       |                                                                                                                                                                                                                                    |
|----------------------|-------------------------------------|----------------------------------------------------------------------------------------------------------------------------------------------------|-------------------|-------------|---------------------------------------------------------------------|-----------------------------------------------|------------------------------------------------------------------------------------------|----------------------------------------------------------------------------------------------------------------------------|-------------------------------------------------------------------------------------------|-----------------------------------------------------------------------------------------------------------------------|------------------------------------------------------------------------------------------------------------------------------------------------------------------------------------------------------------------------------------|
|                      |                                     | (ARIC, DHS, JHS, MESA)                                                                                                                             |                   |             |                                                                     |                                               | validation for Black adults: 3,845. White adults: 7,858; for external validation: 3,236. | (5.9). White adults: 60.2 (10.8)-63.0 (5.6))                                                                               | White adults: 52.4%-53.8%).                                                               | adults (8.1%; men: 9.4%, women: 7.0%). In the external validation cohort, Black adults: 7.4%; and White adults: 3.1%. |                                                                                                                                                                                                                                    |
| Stabellini 2023 (29) | Cancers                             | Women aged ≥ 18 years who are diagnosed with breast cancer at any stage (administrative data)                                                      | United States     | Institution | Median (IQR) in month: 5.8 (1.5-13.62)                              | MACE                                          | 4,309                                                                                    | Median (IQR) in year: 63 (53-72)                                                                                           | 100%                                                                                      | 11.4%                                                                                                                 | MACE included HF, acute coronary syndrome, atrial fibrillation, and ischemic stroke.                                                                                                                                               |
| Sung 2019 (30)       | PLoS ONE                            | Adults (age 40 to 79 years) who did not have CVD at the baseline (administrative data)                                                             | Republic of Korea | Community   | Maximum: 10-years                                                   | CVD                                           | 361,239 External validation set:4,292                                                    | Mean (SD) in year: 51.2 (8.9)                                                                                              | 43.24%                                                                                    | 7.0%                                                                                                                  | CVD were defined as CVD mortality (International Classification of Diseases 10th edition (ICD-10) code), hospitalisation due to MI, coronary arterial intervention or bypass surgery or hospitalization due to stroke              |
| Turchin 2023 (31)    | Obesity Science and Practice        | Adults (age 18-80 years) with body mass index (BMI) between 25 and 80 kg/m2 who were being treated in primary care practices (administrative data) | United States     | Institution | Median in year: 5.6 years                                           | ASCVD and HF                                  | 433,272                                                                                  | Mean (SD) in year: 47.9 (15.7)                                                                                             | 52.2%                                                                                     | ASCVD: 11.7%; and HF: 5.0%                                                                                            | Based on International Classification of Diseases 9th and 10th edition (ICD-9 and ICD-10.                                                                                                                                          |
| Wang 2023 (32)       | International Journal of Cardiology | Adults (aged ≥45 years) recruited randomly from the general population (45 and Up study)                                                           | Australia         | Community   | Median in year (CVD mortality: 10.4; and IHD hospitalisation: 11.6) | CVD mortality and IHD-related hospitalisation | 187,268                                                                                  | Mean (SD) in years (CVD mortality- No: 59.4 (9.6); Yes: 76.5 (10.6). IHD hospitalisation- No: 59.5 (9.8); Yes: 64.1 (9.9)) | CVD Mortality - No: (57.2%); Yes: (47.5%). IHD hospitalisation- No: (58.4%); Yes: (38.0%) | CVD mortality: 2.0%; and IHD hospitalisation: 6.9%.                                                                   | CVD mortality: CVD-related mortality (ICD codes I00–I99, G45 and G46). IHD hospitalisation was defined as a primary diagnosis with ICD codes I20-I25, also known as CHD, coronary artery disease and atherosclerotic heart disease |
| Zhuang 2022 (33)     | The Canadian Journal of Cardiology  | Middle-aged (age 45 to 64) adults (ARIC)                                                                                                           | United States     | Community   | Median in year (CVD: 23.36; and CHD: 25.03).                        | CVD and CHD                                   | 14,842                                                                                   | Mean (SD) in year: 54.2 (5.8)                                                                                              | 54.8%                                                                                     | CVD: 32.3%; and CHD: 16.4%.                                                                                           | CVD represented a composite of CHD, stroke, and HF. The criteria for CHD included any MI, resuscitated cardiac arrest,                                                                                                             |

|  |  |  |  |  |  |  |  |  |  |  |  |                                                                                    |
|--|--|--|--|--|--|--|--|--|--|--|--|------------------------------------------------------------------------------------|
|  |  |  |  |  |  |  |  |  |  |  |  | definite angina, probable angina followed by revascularization, and CHD mortality. |
|--|--|--|--|--|--|--|--|--|--|--|--|------------------------------------------------------------------------------------|

**Abbreviations-** ASCVD: Atherosclerotic cardiovascular disease; CAD: Coronary artery disease; CHD: Coronary heart disease; CVD: Cardiovascular disease; HF: Heart failure; IQR: Inter quartile range; MACE: Major cardiovascular accident; MI: Myocardial infarction; NR: Not reported; and SD: Standard deviation.

**Table S5.** Characteristics of survival prediction models used for cardiovascular disease risk prediction.

| Author and Year           | Modeling methods                                          |                                           | Best performed model                      | Performance measures               | Values of the importance measures with 95%CI, if any, (for the best fitted model)                                                                                               | Number of predictors |             | Methods to select final predictors                          | Types of candidate predictors                                                                        | Stratification based on gender | Accounted SDoH variables                                         | Model validation                                            | Model interpretation techniques (Explainable AI)                                                                       |
|---------------------------|-----------------------------------------------------------|-------------------------------------------|-------------------------------------------|------------------------------------|---------------------------------------------------------------------------------------------------------------------------------------------------------------------------------|----------------------|-------------|-------------------------------------------------------------|------------------------------------------------------------------------------------------------------|--------------------------------|------------------------------------------------------------------|-------------------------------------------------------------|------------------------------------------------------------------------------------------------------------------------|
|                           | Machine learning algorithms                               | Deep learning algorithms                  |                                           |                                    |                                                                                                                                                                                 | Candidate            | Final       |                                                             |                                                                                                      |                                |                                                                  |                                                             |                                                                                                                        |
| Ambale-Venkatesh 2017 (1) | LASSO-Cox and RSF. - standard Cox-PH model for comparison | None                                      | RSF                                       | C-index and Brier score            | C-index-CVD: 0.80; CHD: 0.80; Stroke: 0.75; HF: 0.84. Brier score-CVD: 0.079; CHD: 0.065; Stroke: 0.030; HF: 0.033.                                                             | 735 (3 SDoH)         | 20 (0 SDoH) | RSF based on minimal depth of the maximal subtree           | Traditional risk factors and imaging features                                                        | No                             | Level of education, economic status/ income, and race            | Internal: Train-test split<br>External: No                  | None                                                                                                                   |
| Barbieri 2022 (2)         | None. - standard Cox-PH model for comparison              | DeepSurv                                  | DeepSurv                                  | C-index and integrated Brier score | Women (C-index: 0.813 (0.812, 0.814), integrated Brier score: 0.00971 (0.00970, 0.00972)). Men (C-index: 0.771 (0.771, 0.772), integrated Brier score: 0.0176 (0.0176, 0.0176). | 23 (2 SDoH)          | 23 (2 SDoH) | Selection not done                                          | Traditional factors and all diagnoses, procedures, and medications                                   | Yes                            | <i>Ethnicity and level of deprivation</i>                        | Internal: Stratified 5 × 2 cross-validation<br>External: No | None                                                                                                                   |
| Bauer 2023 (3)            | RSF. - standard Cox-PH model for comparison               | None                                      | RSF                                       | C-index                            | C-index: 0.74(0.71, 0.76)                                                                                                                                                       | 18 (0 SDoH)          | 18 (0 SDoH) | Selection not done                                          | Traditional factors, and Cardiac Computed Tomography Angiography derived variables (imaging feature) | No                             | None                                                             | Internal: Repeated nested cross validation<br>External: No  | Permutation feature importance                                                                                         |
| Blanchard 2022 (4)        | None. - standard Cox-PH model for comparison              | Deep survival conventional neural network | Deep survival conventional neural network | C-index and AUC                    | Whole sample: C-index: 0.788 and AUC: 0.823<br>Women: C-index: 0.792 and AUC: 0.821<br>Men: C-index: 0.742 and AUC: 0.779                                                       | 12 (0 SDoH)          | 12 (0 SDoH) | Selection not done                                          | Traditional factors and sleep signals                                                                | Yes                            | None                                                             | Internal: Train-test split<br>External: No                  | Contribution of features using weighted ratio (i.e., importance of the sleep signals compared to the clinical feature) |
| Brester 2023 (5)          | RSF. - standard cause-specific and sub-distribution       | None                                      | RSF                                       | AUC                                | NR                                                                                                                                                                              | 950                  | 613         | Selection not done (considered variables with less than 5%) | No detailed information given (majorly traditional factors)                                          | Not necessary (All men)        | Probably none (Not clear because list of variables is not given) | Internal: train-test split<br>External: No                  | None                                                                                                                   |

|                |                                                                                |                                       |                                                                                                                |                                               |                                                                                                                                                               |                                                       |              |                    |                                                                                                                                                                                               |                                      |                                                                  |                                                   |                                                     |
|----------------|--------------------------------------------------------------------------------|---------------------------------------|----------------------------------------------------------------------------------------------------------------|-----------------------------------------------|---------------------------------------------------------------------------------------------------------------------------------------------------------------|-------------------------------------------------------|--------------|--------------------|-----------------------------------------------------------------------------------------------------------------------------------------------------------------------------------------------|--------------------------------------|------------------------------------------------------------------|---------------------------------------------------|-----------------------------------------------------|
|                | PH models for comparison                                                       |                                       |                                                                                                                |                                               |                                                                                                                                                               |                                                       |              | missing values)    |                                                                                                                                                                                               |                                      |                                                                  |                                                   |                                                     |
| Chhoa 2023 (6) | Elastic Net Cox, Component-Wise Gradient Boosting, and RSF                     | None                                  | RSF (based on discrimination) and Component-Wise Gradient Boosting model (according to integrated brier score) | Brier score and AUC                           | Component-Wise Gradient Boosting model (Brier Score: 0.165(SE=0.022). RSF (AUC: 0.764 (SE=0.068)                                                              | 99 (1 SDoH)                                           | 99 (1 SDoH)  | Selection not done | Traditional factors, medical history and associated pathology, disease history, MRI features, Genetic information, biological sampling, and Clinical and cognitive/neuro-psychological scores | No                                   | <i>Level of education</i>                                        | Internal: nested cross-validation<br>External: No | Using component wise gradient boosting coefficients |
| Chun 2021 (7)  | RSF. - Framingham Stroke Risk Profile and standard Cox-PH model for comparison | None                                  | RSF                                                                                                            | AUC and Nam-D'Agostino test (for calibration) | Men: AUC: 0.826 (0.818, 0.834), Nam-D'Agostino test ( $\chi^2$ : 61(36, 90)). Women: AUC: 0.832 (0.824, 0.839), Nam-D'Agostino test ( $\chi^2$ : 62 (36, 95)) | 143 (Categorical variables were dummy coded) (4 SDoH) | 143 (4 SDoH) | Selection not done | Sociodemographic factors, diet, medical history, physical activity, physical measurements, and traditional factors.                                                                           | Yes                                  | <i>Region, level of education, occupation, and income</i>        | Internal: train-test split<br>External: No        | Feature importance (Gini importance)                |
| Deng 2023 (8)  | None. -Standard Cox-PH model and Pooled Cohort Equations (PCE) for comparison  | Nnet-survival, Deepsurv, and Cox-nnet | PCE for Black men. DeepSurv for Black women and White men and Women.                                           | C-index                                       | 10x10 CV -C-index (for White men: 0.7371; White women: 0.797; Black men: 0.698; and Black women: 0.789).                                                      | 7 (0 SDoH)                                            | 7 (0 SDoH)   | Selection not done | Traditional factors                                                                                                                                                                           | Yes (along with race – Black/ White) | <i>Race (as a stratified variable)</i>                           | Internal: 10x10 cross-validation<br>External: Yes | None                                                |
| Duan 2024* (9) | Elastic Net Cox, RSF, Survival                                                 | None                                  | Elastic Net Cox                                                                                                | C-index, AUC, and                             | C-index: 0.926 (0.924, 0.927); AUC: 0.935 (0.933, 0.936);                                                                                                     | 61 (4 SDoH)                                           | 38 (4 SDoH)  | Elastic Net        | Traditional factors, and                                                                                                                                                                      | No                                   | <i>Ethnicity, level of education, marital status, and family</i> | Internal: train-test split<br>External: No        | Shapley Additive exPlanations                       |

|                            |                                                                                                                             |                                                               |                                        |                                                                                            |                                                                        |             |             |                                              |                                                                                                                 |    |                                             |                                                    |                                      |
|----------------------------|-----------------------------------------------------------------------------------------------------------------------------|---------------------------------------------------------------|----------------------------------------|--------------------------------------------------------------------------------------------|------------------------------------------------------------------------|-------------|-------------|----------------------------------------------|-----------------------------------------------------------------------------------------------------------------|----|---------------------------------------------|----------------------------------------------------|--------------------------------------|
|                            | Gradient Boosting, and ExtraSurvival Trees.<br>- Standard Cox-PH model for comparison                                       |                                                               |                                        | Brier score                                                                                | Brier score: 0.024 (0.023,0.025).                                      |             |             | Penalised Cox-PH model                       | environmental chemicals                                                                                         |    | <i>income-poverty ratio level</i>           |                                                    | (SHAP), and partial dependence plots |
| Farhadian 2021 (10)        | RSF.<br>- Standard Cox-PH model for comparison                                                                              | None                                                          | RSF                                    | C index and integrated Brier score                                                         | C index: 0.648; integrated Brier score: 0.124                          | 13 (0 SDoH) | 13 (0 SDoH) | Selection not done                           | Traditional factors                                                                                             | No | None                                        | Internal: Out-of-bag (OBB) sample<br>External: No  | Permutation feature importance       |
| Feng 2022 (11)             | LMTLR and RSF.<br>- Standard Cox-PH model for comparison                                                                    | NMTLR                                                         | NMTLR                                  | C-index, Brier score, RMSE, and MAE                                                        | C-index: 0.8202; Brier score: 0.0243; RMSE: 143.49; and MAE: 132.54.   | 25 (1 SDoH) | 25 (1 SDoH) | Selection not done                           | Traditional factors                                                                                             | No | <i>Region of residence (urban vs rural)</i> | Internal: train-test split<br>External: No         | None                                 |
| Gandin 2023 (12)           | None.<br>- Standard Cox-PH model for comparison                                                                             | DeepSurv                                                      | DeepSurv                               | C-index, AUC, graphical assessment of calibration, and Integrated Calibration Index (ICI). | C-index: 0.768; 5-year AUC: 0.780 (0.743,0.817); and 5-year ICI: 0.015 | 33 (0 SDoH) | 20 (0 SDoH) | A forward selection procedure using c-index  | Traditional factors, laboratory tests and procedures, and cardiovascular drugs prescriptions, and comorbidities | No | None                                        | Internal: train-test split<br>External: No         | Partial dependence plots (PDPs)      |
| Gao 2023 (13)              | Elastic Net Cox, Survival Gradient Boosting, FastKernelSVM, FastSurvSVM, and RSF.<br>- Standard Cox-PH model for comparison | Denoising autoencoder Survival network: a deep learning model | Denoising autoencoder Survival network | C-index                                                                                    | C-index: 0.846 (0.790, 0.888)                                          | 36 (0 SDoH) | 36 (0 SDoH) | Selection not done                           | Heart motion information and traditional factors                                                                | No | None                                        | Internal: Bootstrap method<br>External: No         | None                                 |
| Garcia-Carretero 2019 (14) | LASSO-Cox and Elastic Net Cox. - Standard Cox-PH model for comparison                                                       | None                                                          | Elastic Net Cox                        | C-index, AUC, and calibration plot                                                         | C-index: 0.658 and AUC: 0.673                                          | 15 (0 SDoH) | 3 (0 SDoH)  | LASSO and Elastic Net Penalised Cox-PH model | Traditional factors                                                                                             | No | None                                        | Internal: 10-fold cross-validation<br>External: No | Nomogram                             |

|                    |                                                            |                                              |                           |                                                                            |                                                                                                                                                                                                              |             |             |                                                                                                                                                              |                                                                                                                    |    |                                                       |                                                   |                                                                                                                          |
|--------------------|------------------------------------------------------------|----------------------------------------------|---------------------------|----------------------------------------------------------------------------|--------------------------------------------------------------------------------------------------------------------------------------------------------------------------------------------------------------|-------------|-------------|--------------------------------------------------------------------------------------------------------------------------------------------------------------|--------------------------------------------------------------------------------------------------------------------|----|-------------------------------------------------------|---------------------------------------------------|--------------------------------------------------------------------------------------------------------------------------|
| Hathaway 2021 (15) | RSF and linear SVM. - Standard Cox-PH model for comparison | NMTLR and DeepSurv.                          | DeepSurv                  | C-index, AUC, net reclassification improvement, and integrated Brier score | C-index: 0.80 (0.78, 0.82); AUC: 0.84 (0.83-0.84); and integrated Brier score; 0.09 (0.08, 0.09).                                                                                                            | 37 (3 SDoH) | 33 (3 SDoH) | Selection not done but features with correlation coefficient >0.8 (n=4) were removed.                                                                        | Traditional factors, inflammatory biomarkers, and imaging features                                                 | No | <i>Level of education, income, and race/ethnicity</i> | Internal: train-test split<br>External: Yes       | RSF: Feature importance (using mean decrease Gini).<br>Others: Permutation feature importance                            |
| Jain 2021 (16)     | Extreme Gradient Boosting with a Cox loss function.        | None                                         | Extreme gradient boosting | C-index                                                                    | C-index: 0.72 (0.59, 0.85)                                                                                                                                                                                   | 35 (1 SDoH) | 35 (1 SDoH) | Selection not done                                                                                                                                           | Traditional factors, prior cardiac conditions, indication for liver Transplantation and relevant laboratory values | No | <i>Race</i>                                           | Internal: 5-fold cross-validation<br>External: No | Shapley Additive exPlanations (SHAP)                                                                                     |
| Kim 2023 (17)      | RSF. - Standard Cox-PH model for comparison                | DeepSurv and Deep Survival Machines (DeepSM) | DeepSurv                  | C-index and integrated Brier score                                         | Without brain-MRI (diffusion-weighted imaging – DWI) features: C-index: 0.824 (0.750, 0.885); integrated Brier score: 0.066 (0.051-0.083)<br>With DWI: C-index 0.850 (0.784-0.904); IBS: 0.064 (0.048-0.081) | 60 (0 SDoH) | 39 (0 SDoH) | LASSO Penalised Cox-PH model                                                                                                                                 | Traditional factors and imaging features                                                                           | No | None                                                  | Internal: train-test split<br>External: No        | Permutation feature importance                                                                                           |
| Lin 2023 (18)      | LASSO-Cox model and RSF                                    | DeepSurv                                     | DeepSurv                  | C-index                                                                    | C-index: 0.826                                                                                                                                                                                               | 25 (0 SDoH) | 10 (0 SDoH) | Selection not done but used permutation-based feature importance from RSF and LASSO penalized Cox-PH model i.e., analysed top 5, 10, 15, 20 and 25 features. | Traditional factors and vital sign values                                                                          | No | None                                                  | Internal: train-test split<br>External: No        | Coefficient values for and then simplified risk scoring system for LASSO-Cox, and Permutation feature importance for RSF |

|                          |                                                                                                                                                |         |                          |                                          |                                                                                                                                                                                 |                                                                                |                                       |                                                                                          |                                                                                              |    |                                                                                                                                                                                                                                                                                                                                                                                   |                                                             |                                                                                   |
|--------------------------|------------------------------------------------------------------------------------------------------------------------------------------------|---------|--------------------------|------------------------------------------|---------------------------------------------------------------------------------------------------------------------------------------------------------------------------------|--------------------------------------------------------------------------------|---------------------------------------|------------------------------------------------------------------------------------------|----------------------------------------------------------------------------------------------|----|-----------------------------------------------------------------------------------------------------------------------------------------------------------------------------------------------------------------------------------------------------------------------------------------------------------------------------------------------------------------------------------|-------------------------------------------------------------|-----------------------------------------------------------------------------------|
| Mauger 2023 (19)         | RSF                                                                                                                                            | None    | RSF                      | IPA and AUC.                             | CVD: IPA (%): 12.7 ± (1.2) and AUC: 0.78 ± 0.00.<br>CHD: IPA (%): 11.5 ± 0.8 ± 1.2 and AUC: 0.77 ± 0.01.<br>HF: IPA (%): 14.6 ± 2.4 and AUC: 0.83 ± 0.01                        | 46 (1 SDoH)                                                                    | 46 (1 SDoH)                           | Selection not done                                                                       | Traditional factors and image features                                                       | No | <i>Race</i>                                                                                                                                                                                                                                                                                                                                                                       | Internal: train-test split<br>External: No                  | Feature importance (mean of the minimal depth of the maximal subtree)             |
| Moreno-Sánchez 2023 (20) | RSF, Extra Survival Trees, Survival Gradient Boosting, and Survival support vector machines (SSVMs).<br>- Standard Cox-PH model for comparison | None    | Gradient Boosting models | C-index and AUC                          | C-index: 0.724 and AUC: 0.748                                                                                                                                                   | 11 (0 SDoH)                                                                    | 7 (0 SDoH)                            | ANOVA, chi-squared, Mutual information (mut-inf), or recursive feature elimination (RFE) | Traditional factors                                                                          | No | None                                                                                                                                                                                                                                                                                                                                                                              | Internal: train-test split<br>External: No                  | Shapley Additive explanations (SHAP) and Partial dependence plots (PDPs)          |
| Morris 2023 (21)         | RSF and Ridge regression                                                                                                                       | DeepHit | DeepHit                  | C-index                                  | Traditional RFs - C-index: 0.76<br>Traditional RFs + Psychosocial/socioeconomic - C-index: 0.76<br>Traditional RFs + Psychosocial/socioeconomic + Environmental - C-index: 0.76 | 161 (Categorical variables were dummy coded) (14 SDoH; summarized accordingly) | 161 (14 SDoH; summarised accordingly) | Selection not done                                                                       | Traditional and social determinants (psychosocial, socioeconomic, and environmental factors) | No | <i>Health insurance, discrimination, favorable food stores, family income, Stress, employment status, Proportion of households in census tract with no vehicle, walking destinations available within area to resident, race, depressive Symptoms, level of education, Unconditional Empirical, Bayes Estimate for Social Cohesion PCA-base, and occupation, country of birth</i> | Internal: train-test split<br>External: No                  | Shapley Additive Explanation (SHAP)                                               |
| Nguyen 2023 (22)         | LASSO-Cox and RSF.<br>- Standard Cox-PH model for comparison                                                                                   | DeepHit | RSF                      | C-index, integrated AUC, and Brier score | C-index: 0.778 (0.757, 0.801); integrated AUC: 0.808 (0.790, 0.826); and Brier score: Lower Brier Score (its exact value not reported)                                          | 35 (3 SDoH)                                                                    | 35 (3 SDoH)                           | Selection not done                                                                       | Traditional risk factors, anthropometry, physiological measures, medications, socioeconomic  | No | <i>Race, level of education, and ability to pay for the very basics</i>                                                                                                                                                                                                                                                                                                           | Internal: 5-fold x 2 times cross-validation<br>External: No | Permutation feature importance, Shapley Additive Explanation (SHAP), and Temporal |

|                    |                                                                                                                                         |          |                            |                                                               |                                                                                                                                                                                 |                                                                    |                                             |                                               |                                                                            |     |                                                              |                                             |                                                            |
|--------------------|-----------------------------------------------------------------------------------------------------------------------------------------|----------|----------------------------|---------------------------------------------------------------|---------------------------------------------------------------------------------------------------------------------------------------------------------------------------------|--------------------------------------------------------------------|---------------------------------------------|-----------------------------------------------|----------------------------------------------------------------------------|-----|--------------------------------------------------------------|---------------------------------------------|------------------------------------------------------------|
|                    |                                                                                                                                         |          |                            |                                                               |                                                                                                                                                                                 |                                                                    |                                             |                                               | c, and medical history                                                     |     |                                                              |                                             | Importance Model Explanation (TIME)                        |
| Qian 2023 (23)     | LASSO-Cox and RSF. - Standard Cox-PH model, China-PAR, and Framingham risk score models for comparison                                  | None     | RSF                        | C-index, AUC, and Brier score                                 | Men: C-index: 0.780 (0.730, 0.829); AUC: 0.791 (0.767, 0.813); and Brier Score: 0.060. Women: C-index: 0.737 (0.702, 0.771); AUC: 0.759 (0.734, 0.783); and Brier Score: 0.110. | 61 (3 SDoH)                                                        | 20 (0 SDoH) in men and 18 (0 SDoH) in women | Cox multivariate analysis, LASSO-Cox, and RSF | Traditional factors, serological indicators, and questionnaire information | Yes | Level of education, occupation, and marital status           | Internal: train-test split<br>External: No  | Permutation feature importance                             |
| Ren 2022 (24)      | RSF. - Standard Cox-PH model for comparison                                                                                             | DeepSurv | DeepSurv                   | C-index, AUC, and integrated Brier score                      | C-index: 0.767(0.717, 0.817); AUC: 0.780 (0.721, 0.839), and integrated Brier score: 0.067.                                                                                     | 91 (uncertain SDoH)                                                | 7 (0 SDoH)                                  | LASSO Penalised Cox-PH model                  | Demographic, clinical characteristics, and laboratory results              | No  | No (in the final model) and uncertain at preprocessing stage | Internal: train-test split<br>External: No  | Feature importance (calculated by their component weights) |
| Rigdon 2019 (25)   | Survival Gradient Boosting and RSF. - Standard Cox-PH model for comparison                                                              | None     | RSF                        | C-index and Greenwood-Nam-D'Agostino test a (for calibration) | With SDoH: C-index: 0.93 (NR); and Calibration slope: 1.01 (NR). Without SDoH: C-index: 0.93 (0.92, 0.94) and calibration slope: 1.01 (0.76 to 1.27)                            | 11 traditional risk factors and 107 nutritional variables (3 SDoH) | Same 128 (3 SDoH)                           | Selection not done                            | Traditional factors and nutrition related variables                        | No  | <i>Level of education, poverty, race/ethnicity</i>           | Internal: train-test split<br>External: No  | Partial dependence plots (PDPs)                            |
| Sabovcik 2022 (26) | Survival Gradient Boosting, Elastic Net Cox, and stacking method. - Pooled Cohort Equations to Prevent HF (PCP-HF) score for comparison | None     | Survival Gradient Boosting | C-index and calibration                                       | C-index: 0.735 (0.728, 0.742); and Calibration: well calibrated                                                                                                                 | 33 (0 SDoH)                                                        | 33 (0 SDoH)                                 | Selection not done                            | Traditional factors and Electrocardiographic parameters                    | No  | None                                                         | Internal: train-test split<br>External: Yes | Permutation based feature importance                       |
| Segar 2019 (27)    | RSF. - Standard Cox-PH model for comparison                                                                                             | None     | RSF                        | C-index and Hosmer and                                        | C-index: 0.77 (0.75, 0.80); and Hosmer-Lemshow statistic $\chi^2$ : 59.63, P=0.29                                                                                               | 109 (3 SDoH)                                                       | 8-11 (0 SDoH)                               | 11 (0 SDoH) from stepwise backward;           | Traditional factors, Electrocardiographic parameters,                      | No  | Race, level of education, and living with other adults       | Internal: train-test split<br>External: Yes | Machine learning-derived risk score                        |



|                         |                                                                                                                      |      |                                                           |                  |                                                                                                                                                                                                                                                                                                                                                                                                                                                    |                                                                                                                                                                                    |                         |                                                                                                                                                                                                                                                 |                                                                                                  |                                         |                                                                                                                                                                                                                                                                                                                                                                                                                                                                                                                                  |                                                 |                                             |
|-------------------------|----------------------------------------------------------------------------------------------------------------------|------|-----------------------------------------------------------|------------------|----------------------------------------------------------------------------------------------------------------------------------------------------------------------------------------------------------------------------------------------------------------------------------------------------------------------------------------------------------------------------------------------------------------------------------------------------|------------------------------------------------------------------------------------------------------------------------------------------------------------------------------------|-------------------------|-------------------------------------------------------------------------------------------------------------------------------------------------------------------------------------------------------------------------------------------------|--------------------------------------------------------------------------------------------------|-----------------------------------------|----------------------------------------------------------------------------------------------------------------------------------------------------------------------------------------------------------------------------------------------------------------------------------------------------------------------------------------------------------------------------------------------------------------------------------------------------------------------------------------------------------------------------------|-------------------------------------------------|---------------------------------------------|
|                         |                                                                                                                      |      |                                                           | Lemsho<br>w test | - A model with RSF-<br>selected variables<br>performed better.                                                                                                                                                                                                                                                                                                                                                                                     |                                                                                                                                                                                    |                         | 8 (0 SDoH)<br>from<br>stepwise<br>forward; 10<br>(0 SDoH)<br>from<br>permutation<br>based RSF                                                                                                                                                   | baseline<br>antihyperglyce<br>mic therapies,<br>and<br>treatment<br>randomisation                |                                         |                                                                                                                                                                                                                                                                                                                                                                                                                                                                                                                                  |                                                 |                                             |
| Segar 2021<br>(28)      | LASSO-Cox,<br>Ridge-Cox,<br>Oblique RSF,<br>Gradient<br>Boosting,<br>- Standard<br>Cox-PH<br>model for<br>comparison | None | Obliqu<br>e RSF                                           | C-index          | Race-specific model:<br>C-index: 0.88 (0.85,<br>0.90) among Black<br>adults and 0.88 (0.85,<br>0.90) for White<br>adults.<br>Race as a covariate<br>model: C-index 0.81<br>(0.78-0.83) for Black<br>adults; C-index 0.80<br>(0.76-0.85) for White<br>adults.                                                                                                                                                                                       | 54 [5<br>SDoH<br>SP]<br>(remain<br>ed 39 [3<br>SDoH]<br>after<br>excludin<br>g the<br>variables<br>with<br>>20%<br>missingn<br>ess and<br>correlatio<br>n<br>coefficie<br>nt >0.70 | 39 vs<br>20 (3<br>SDoH) | Selection<br>not done<br>(but<br>compared<br>the performanc<br>e of the<br>RSF with<br>20<br>variables<br>and the 39<br>variables<br>based on C-<br>index and<br>found RSF<br>model with<br>20<br>variables a<br>relatively<br>better<br>model) | Traditional<br>factors,<br>electrocardiog<br>raphic<br>parameters,<br>and<br>medications         | No                                      | <i>Income level, family<br/>income, level of<br/>education, time caring<br/>for others, and race as<br/>a stratified variable</i>                                                                                                                                                                                                                                                                                                                                                                                                | Internal: train-<br>test split<br>External: Yes | Permutation-<br>based feature<br>importance |
| Stabellini<br>2023 (29) | Extreme<br>Gradient<br>Boosting                                                                                      | None | Extrem<br>e Gradie<br>nt Boosti<br>ng (no compar<br>ison) | C-index          | C-index: 0.78 (0.76,<br>0.79) and 0.81(0.80,<br>0.82) without and<br>with SDoH data,<br>respectively for the<br>race-agnostic models.<br>C-index: 0.74 (0.72,<br>0.76) and 0.75 (0.73,<br>0.78) in non-Hispanic<br>Black women models<br>without and with<br>SDoH data,<br>respectively.<br>C-index: 0.79 (0.77,<br>0.80) and 0.79 (0.77,<br>0.80) among non-<br>Hispanic White<br>women models<br>without and with<br>SDOH data,<br>respectively. | 39 (24<br>SDoH)                                                                                                                                                                    | 39 (24<br>SDoH)         | Selection<br>not done                                                                                                                                                                                                                           | Traditional<br>factors,<br>SDoH, tumor<br>characteristics<br>, and breast<br>cancer<br>treatment | Not<br>necessa<br>ry (All<br>women<br>) | <i>Social and community<br/>context (marital status,<br/>number of household<br/>members, distance to<br/>closest relatives);<br/>economic stability<br/>(address stability,<br/>property status, annual<br/>income, properties<br/>owned, wealth index,<br/>household income,<br/>total count of transport<br/>properties owned);<br/>neighborhood and<br/>built environment<br/>(crime index, burglary<br/>index, car theft index,<br/>murder index,<br/>neighborhood median<br/>household income,<br/>neighborhood median</i> | Internal: train-<br>test split<br>External: No  | None                                        |

|                   |                                                     |                                                                                                                       |                     |                              |                                                                                                                                        |             |                                                                              |                                                                                                                                                |                                                                 |     |                                                                                                                                   |                                             |                                        |
|-------------------|-----------------------------------------------------|-----------------------------------------------------------------------------------------------------------------------|---------------------|------------------------------|----------------------------------------------------------------------------------------------------------------------------------------|-------------|------------------------------------------------------------------------------|------------------------------------------------------------------------------------------------------------------------------------------------|-----------------------------------------------------------------|-----|-----------------------------------------------------------------------------------------------------------------------------------|---------------------------------------------|----------------------------------------|
|                   |                                                     |                                                                                                                       |                     |                              |                                                                                                                                        |             |                                                                              |                                                                                                                                                |                                                                 |     | <i>home values); and educational access and quality (education institution rating, college attendance).</i>                       |                                             |                                        |
| Sung 2019 (30)    | None. - Standard Cox-PH model for comparison        | Deep learning algorithm model based on survival analysis (Recurrent Neural Network Long Short-Term Memory (RNN-LSTM)) | Deep learning model | C-index or AUC.              | Men: 2-year AUC: 0.94 (0.91, 0.97). Women: AUC: 0.96 (0.95, 0.97)                                                                      | 23 (0 SDoH) | 23 (0 SDoH)                                                                  | Selection not done                                                                                                                             | Traditional factors                                             | Yes | None                                                                                                                              | Internal: train-test split<br>External: Yes | Layer-wise Relevance Propagation (LRP) |
| Turchin 2023 (31) | LASSO-Cox and RSF                                   | None                                                                                                                  | RSF                 | C-index                      | ASCVD: C-index: 0.812. HF: C-index: 0.871.                                                                                             | 40          | 35 (2 SDoH) for ASCVD<br>32 (2 SDoH) for HF                                  | Bivariate analysis with outcome and selected the candidate variables with P <0.15 and RSF model was conducted using the minimal depth approach | Traditional factors                                             | No  | <i>Marital status and commercial insurance</i>                                                                                    | Internal: train-test split<br>External: No  | None                                   |
| Wang 2023 (32)    | LASSO-Cox, Ridge regression, fast survival SVM, RSF | None                                                                                                                  | LASSO-Cox           | C-index (Harrel's and Uno's) | CVD Mortality: Harrel's C-index: 0.9004; Uno's C-index: 0.8976<br>IHD Hospitalisation: Harrel's C-index: 0.7178; Uno's C-index: 0.7105 | 98 (7 SDoH) | 98 (7 SDoH) (3 SDoH in top 20 of CVD mortality model) (2 SDoH in IHD hospita | Selection not done                                                                                                                             | Socioeconomic status, traditional factors, and dietary patterns | No  | <i>Health insurance, level of education, country of birth, IRSD quintile, remoteness, Annual household income, and employment</i> | Internal: train-test split<br>External: No  | SHapley Additive exPlanations (SHAP)   |

|                     |                                                                          |      |     |                                  |                                                                                                                         |     |                                                     |                                                                                                        |                                                                                                                                     |    |                                                |                                                                        |                                                                                         |
|---------------------|--------------------------------------------------------------------------|------|-----|----------------------------------|-------------------------------------------------------------------------------------------------------------------------|-----|-----------------------------------------------------|--------------------------------------------------------------------------------------------------------|-------------------------------------------------------------------------------------------------------------------------------------|----|------------------------------------------------|------------------------------------------------------------------------|-----------------------------------------------------------------------------------------|
|                     |                                                                          |      |     |                                  |                                                                                                                         |     | lisation<br>top 20)                                 |                                                                                                        |                                                                                                                                     |    |                                                |                                                                        |                                                                                         |
| Zhuang 2022<br>(33) | LASSO-Cox<br>and RSF.<br>- Standard<br>Cox-PH<br>model for<br>comparison | None | RSF | C-index<br>and<br>Brier<br>score | CVD: C-index: 0.78<br>(0.77, 0.78; Brier<br>score: 0.059. CHD:<br>C-index: 0.80 (0.79,<br>0.81); Brier score:<br>0.032. | 300 | 20 (1<br>SDoH<br>in<br>CVD, 0<br>SDoH<br>in<br>CHD) | RSF<br>(Based on<br>minimal<br>depth of the<br>maximal<br>subtree)) –<br>top 20 for<br>each<br>outcome | Traditional<br>factors,<br>laboratory<br>biomarkers,<br>family history,<br>and<br>imaging/electr<br>ocardiographi<br>c<br>variables | No | Race, level of<br>education, and <i>income</i> | Internal:<br>Stratified<br>5-fold cross-<br>validation<br>External: No | Feature<br>importance<br>(mean of the<br>minimal<br>depth of the<br>maximal<br>subtree) |

**Abbreviation-** ASCVD: Atherosclerotic cardiovascular disease; AUC: Area under the curve; CHD: Coronary heart disease; CI: Confidence interval; C-index: Concordance index; Cox-PH: Cox Proportional Hazard; CV: Cross validation; CVD: Cardiovascular disease; HF: Heart failure; ICI: Integrated calibration index; IPA: Index of prediction accuracy; LASSO: Least Absolute Shrinkage and Selection Operator; MAE: Mean absolute error; NMTLR: Neural Multi-Task Logistic Regression; NR: Not reported; RMSE: Root mean square error; RSF: Random survival forest; SDoH: Social determinants of health; and SE: Standard error. \*This study was accepted (pre-proof) during our search period and become published in January 2024.

**Table S6.** Patient recruitment year, missing data management, hyperparameter tuning, and software (including libraries/packages) utilised.

| Author and Year            | Patient recruitment year | Missing data management methods                                                                                | Hyperparameter tuning methods                           | Software*                                                   | Packages/libraries utilised for training machine learning models | Code/source code                                                                                                    |
|----------------------------|--------------------------|----------------------------------------------------------------------------------------------------------------|---------------------------------------------------------|-------------------------------------------------------------|------------------------------------------------------------------|---------------------------------------------------------------------------------------------------------------------|
| Ambale-Venkatesh 2017 (1)  | 2000–2002                | Adaptive tree imputation method                                                                                | NR                                                      | R (version NR)                                              | NR                                                               | NR                                                                                                                  |
| Barbieri 2022 (2)          | 2012                     | Complete case analysis                                                                                         | Tree-structured Parzen Estimator                        | Python version 3.7.5                                        | PyTorch, PyCox library, and Optuna                               | <a href="https://github.com/VIEW2020/Varianz2012">https://github.com/VIEW2020/Varianz2012</a>                       |
| Bauer 2023 (3)             | 2004-2017                | No missing data                                                                                                | Grid search                                             | R version 3.6.1, Python version 3.7.3), and MATLAB R2019a   | scikit-survival                                                  | <a href="https://github.com/DHM-CCTA-ML/CCTA_ML_TimeToEvent">https://github.com/DHM-CCTA-ML/CCTA_ML_TimeToEvent</a> |
| Blanchard 2022 (4)         | 2007-2018                | Mode for categorical features and MICE for continuous features                                                 | 5-folds cross validation (to select model architecture) | Python (version NR)                                         | Tensorflow and Scikit Survival                                   | NR                                                                                                                  |
| Brester 2023 (5)           | 1984- 1989               | MICE                                                                                                           | NR                                                      | R and Python (versions NR)                                  | randomForestSRC and see the code for others                      | <a href="https://github.com/christinabrester/isMode">https://github.com/christinabrester/isMode</a>                 |
| Chhoa 2023 (6)             | 2003-2020                | Features with $\geq$ 50% missing values were discarded. The remaining handled using mode and median imputation | Nested cross-validation                                 | Python (version NR)                                         | scikit-survival                                                  | NR                                                                                                                  |
| Chun 2021 (7)              | 2004–2008                | Mean imputation                                                                                                | Grid search                                             | Python version 3.7.0 and R version 3.6.1                    | glmnet, ranger, keras                                            | NR                                                                                                                  |
| Deng 2023 (8)              | 1948 -2010               | Complete case analysis                                                                                         | Grid search                                             | Python, version 3.7.3 and R, version 3.6.0                  | scikit-learn, PyTorch                                            | NR                                                                                                                  |
| Duan 2024 (9)              | 2003-2018                | MissForest                                                                                                     | Grid search                                             | Stata SE 15.1, R 4.0.5, and Python 3.11.2                   | Scikit-survival                                                  | NR                                                                                                                  |
| Farhadian 2021 (10)        | 2009-2012                | No missing data                                                                                                | NR                                                      | R version 3.6.3                                             | randomForestSRC, pcc, survival                                   | NR                                                                                                                  |
| Feng 2022 (11)             | 2009-2015                | Complete case analysis                                                                                         | NR                                                      | SAS version 9.4, R version 3.5.1, and Python version 3.7.6. | PySurvival                                                       | NR                                                                                                                  |
| Gandin 2023 (12)           | 2009-2018                | Mean                                                                                                           | NR                                                      | R version 4.2.1 and Python 3.8.10                           | PyTorch                                                          | NR                                                                                                                  |
| Gao 2023 (13)              | 2015-2020                | MICE                                                                                                           | NR                                                      | SPSS 23.0 and R version 3.6.3                               | NR                                                               | NR                                                                                                                  |
| Garcia-Carretero 2019 (14) | 2006-2017                | Complete case analysis                                                                                         | 10-fold cross-validation                                | R version 3.3.3                                             | NR                                                               | NR                                                                                                                  |
| Hathaway 2021 (15)         | 200-2002                 | Median imputation                                                                                              | Not done                                                | R version 3.6.2 and Python 3.7                              | Pysurvival                                                       | <a href="https://github.com/qahathaway/MESA">https://github.com/qahathaway/MESA</a>                                 |

|                          |           |                                                          |                                                                              |                                                    |                                                         |                                                                                                                                                                                                                                                                                                           |
|--------------------------|-----------|----------------------------------------------------------|------------------------------------------------------------------------------|----------------------------------------------------|---------------------------------------------------------|-----------------------------------------------------------------------------------------------------------------------------------------------------------------------------------------------------------------------------------------------------------------------------------------------------------|
| Jain 2021 (16)           | 2008-2019 | k-nearest-neighbor algorithm                             | Grid search                                                                  | Python 3.7.6                                       | XGBoos                                                  | NR                                                                                                                                                                                                                                                                                                        |
| Kim 2023 (17)            | 2010-2019 | NR                                                       | NR                                                                           | Python (version NR)                                | scikit-survival                                         | NR                                                                                                                                                                                                                                                                                                        |
| Lin 2023 (18)            | 2010-2018 | MissForest                                               | NR                                                                           | Python (version NR) and R version 4.0.             | scikit-survival, pycox                                  | NR                                                                                                                                                                                                                                                                                                        |
| Mauger 2023 (19)         | 2000-2002 | No missing data                                          | NR                                                                           | R (version NR)                                     | NR                                                      | NR                                                                                                                                                                                                                                                                                                        |
| Moreno-Sánchez 2023 (20) | 2015      | No missing data                                          | Grid search                                                                  | Python (version NR)                                | scikit-survival                                         | <a href="https://github.com/petmoreno/Heart_Failure_Predictor">https://github.com/petmoreno/Heart_Failure_Predictor</a>                                                                                                                                                                                   |
| Morris 2023 (21)         | 2000-2004 | Median                                                   | Bayesian hyperparameter optimization (using HyperOpt—an open-source library) | Python version 3.8                                 | PyTorch, PyCox, scikit-survival                         | NR                                                                                                                                                                                                                                                                                                        |
| Nguyen 2023 (22)         | 1985-1986 | Complete case analysis                                   | NR                                                                           | R and Python (versions NR)                         | traj, NbClust, JMBayes, rsfrc (see the code for others) | <a href="https://github.com/cloudbopper/anamod">https://github.com/cloudbopper/anamod</a> ,<br><a href="https://github.com/chl8856/Dynamic-DeepHit">https://github.com/chl8856/Dynamic-DeepHit</a> , and<br><a href="https://github.com/blue-yonder/tsfresh">https://github.com/blue-yonder/tsfresh</a> . |
| Qian 2023 (23)           | 2016      | Mean and mode imputation                                 | 5-fold cross validation                                                      | SPSS version 26.0, and R version 4.0               | NR                                                      | NR                                                                                                                                                                                                                                                                                                        |
| Ren 2022 (24)            | 2013-2020 | MICE                                                     | Bayesian hyperparameter optimization                                         | R version 4.1.1, SPSS version 26, and Python v.3.7 | TensorFlow                                              | <a href="https://github.com/jaredleekatzman/DeepSurv">https://github.com/jaredleekatzman/DeepSurv</a>                                                                                                                                                                                                     |
| Rigdon 2019 (25)         | 1999–2000 | MICE                                                     | Grid search                                                                  | Stata version 15 and R version 3.6.1               | NR                                                      | <a href="https://github.com/joerigdon/CVD_Prediction">https://github.com/joerigdon/CVD_Prediction</a>                                                                                                                                                                                                     |
| Sabovcik 2022 (26)       | NR        | Complete case analysis                                   | Tree-structured parzen estimator                                             | Python (version NR)                                | scikit-survival                                         | <a href="https://github.com/heve/incidence-hf">https://github.com/heve/incidence-hf</a>                                                                                                                                                                                                                   |
| Segar 2019 (27)          | NR        | Random forest imputation                                 | NR                                                                           | R version 3.5.1                                    | randomForestSRC                                         | NR                                                                                                                                                                                                                                                                                                        |
| Segar 2021 (28)          | 1996-2004 | Random forest imputation                                 | NR                                                                           | R versions 3.5.1 and 3.6.0                         | obliqueRSF, glmnet, CoxBoost, and xgboost               | NR                                                                                                                                                                                                                                                                                                        |
| Stabellini 2023 (29)     | 2010-2019 | Complete case analysis                                   | Randomised search                                                            | R version 4.2.2                                    | mlr3 and mlr3proba                                      | NR                                                                                                                                                                                                                                                                                                        |
| Sung 2019 (30)           | 2002–2003 | Multiple imputations by fully conditional specifications | NR                                                                           | SAS and R (versions NR)                            | NR                                                      | NR                                                                                                                                                                                                                                                                                                        |
| Turchin 2023 (31)        | 2000-2019 | MissForest and mean imputation                           | NR                                                                           | R version 3.6.3                                    | randomForestSRC and glmnet                              | NR                                                                                                                                                                                                                                                                                                        |
| Wang 2023 (32)           | 2005–2009 | Median or mean values                                    | Grid search                                                                  | Python version 3.6.                                | scikit-survival                                         | NR                                                                                                                                                                                                                                                                                                        |
| Zhuang 2022 (33)         | 1987-1989 | Adaptive tree imputation                                 | NR                                                                           | R version 2.7.2                                    | randomForestSRC and glmnet                              | NR                                                                                                                                                                                                                                                                                                        |

**Abbreviation-** MICE, Multiple Imputation by Chained Equations; NR, Not reported and/or not sure it is done. \*Stata and SPSS were not used to train the models; they were used to preprocess the data.

## Reference

1. Ambale-Venkatesh B, Yang X, Wu CO, Liu K, Gregory Hundley W, McClelland R, et al. Cardiovascular Event Prediction by Machine Learning: The Multi-Ethnic Study of Atherosclerosis. *CIRCULATION RESEARCH*. 2017;121(9):1092-101.
2. Barbieri S, Mehta S, Wu B, Bharat C, Poppe K, Jorm L, et al. Predicting cardiovascular risk from national administrative data bases using a combined survival analysis and deep learning approach. *International Journal of Epidemiology*. 2022;51(3):931-44.
3. Bauer MJ, Nano N, Adolf R, Will A, Hendrich E, Martinoff SA, et al. Prognostic Value of Machine Learning-based Time-toEvent Analysis Using Coronary CT Angiography in Patients with Suspected Coronary Artery Disease. *Radiology: Cardiothoracic Imaging*. 2023;5(2):e220107.
4. Blanchard M, Feuilloy M, Sabil A, Gerves-Pinque C, Gagnadoux F, Girault JM. A Deep Survival Learning Approach for Cardiovascular Risk Estimation in Patients With Sleep Apnea. *IEEE Access*. 2022;10:133468-78.
5. Brester C, Tuomainen TP, Voutilainen A, Kauhanen J, Kolehmainen M. Predicting risk of cardiovascular death in the high-dimensional cohort follow-up data in the presence of competing events: a guide for building a modeling pipeline. *Biostatistics and Epidemiology*. 2023;7(1):e2084704.
6. Chhoa H, Chabriat H, Chevret S, Biard L. Comparison of models for stroke-free survival prediction in patients with CADASIL. *SCIENTIFIC REPORTS*. 2023;13(1):22443.
7. Chun M, Clarke R, Cairns BJ, Clifton D, Bennett D, Chen Y, et al. Stroke risk prediction using machine learning: a prospective cohort study of 0.5 million Chinese adults. *Journal of the American Medical Informatics Association : JAMIA*. 2021;28(8):1719-27.
8. Deng Y, Liu L, Jiang H, Peng Y, Wei Y, Zhou Z, et al. Comparison of State-of-the-Art Neural Network Survival Models with the Pooled Cohort Equations for Cardiovascular Disease Risk Prediction. *BMC medical research methodology*. 2023;23(1):22.
9. Duan S, Wu Y, Zhu J, Wang X, Zhang Y, Gu C, et al. Development of interpretable machine learning models associated with environmental chemicals to predict all-cause and specific-cause mortality : A longitudinal study based on NHANES. *Ecotoxicol Environ Saf*. 2024;270:115864.
10. Farhadian M, Dehdar Karsidani S, Mozayanimonfared A, Mahjub H. Risk factors associated with major adverse cardiac and cerebrovascular events following percutaneous coronary intervention: a 10-year follow-up comparing random survival forest and Cox proportional-hazards model. *BMC Cardiovascular Disorders*. 2021;21(1):38.
11. Feng Y, Leung AA, Lu X, Liang Z, Quan H, Walker RL. Personalized prediction of incident hospitalization for cardiovascular disease in patients with hypertension using machine learning. *BMC medical research methodology*. 2022;22(1):325.
12. Gandin I, Saccani S, Coser A, Scagnetto A, Cappelletto C, Candido R, et al. Deep-learning-based prognostic modeling for incident heart failure in patients with diabetes using electronic health records: A retrospective cohort study. *PLoS ONE*. 2023;18(2):e0281878.
13. Gao Y, Zhou Z, Zhang B, Guo S, Bo K, Li S, et al. Deep learning-based prognostic model using non-enhanced cardiac cine MRI for outcome prediction in patients with heart failure. *European radiology*. 2023;33(11):8203-13.
14. Garcia-Carretero R, Barquero-Perez O, Mora-Jimenez I, Soguero-Ruiz C, Goya-Esteban R, Ramos-Lopez J. Identification of clinically relevant features in hypertensive patients using penalized regression: a case study of cardiovascular events. *Medical and Biological Engineering and Computing*. 2019;57(9):2011-26.
15. Hathaway QA, Yanamala N, Budoff MJ, Sengupta PP, Zeb I. Deep neural survival networks for cardiovascular risk prediction: The Multi-Ethnic Study of Atherosclerosis (MESA). *Computers in Biology and Medicine*. 2021;139:104983.

16. Jain V, Bansal A, Radakovich N, Sharma V, Khan MZ, Harris K, et al. Machine Learning Models to Predict Major Adverse Cardiovascular Events After Orthotopic Liver Transplantation: A Cohort Study. *Journal of Cardiothoracic and Vascular Anesthesia*. 2021;35(7):2063-9.
17. Kim D-Y, Choi K-H, Kim J-H, Hong J, Choi S-M, Park M-S, et al. Deep learning-based personalised outcome prediction after acute ischaemic stroke. *Journal of neurology, neurosurgery, and psychiatry*. 2023;94(5):369-78.
18. Lin C-H, Kuo Y-W, Huang Y-C, Lee M, Huang Y-W, Kuo C-F, et al. Development and Validation of a Novel Score for Predicting Long-Term Mortality after an Acute Ischemic Stroke. *INTERNATIONAL JOURNAL OF ENVIRONMENTAL RESEARCH AND PUBLIC HEALTH*. 2023;20(4).
19. Mauger CA, Gilbert K, Suinesiaputra A, Bluemke DA, Wu CO, Lima JAC, et al. Multi-Ethnic Study of Atherosclerosis: Relationship between Left Ventricular Shape at Cardiac MRI and 10-year Outcomes. *Radiology*. 2023;306(2):e220122.
20. Moreno-Sánchez PA. Improvement of a prediction model for heart failure survival through explainable artificial intelligence. *Front Cardiovasc Med*. 2023;10:1219586.
21. Morris MC, Moradi H, Aslani M, Sims M, Schlundt D, Kouros CD, et al. Predicting incident cardiovascular disease among African-American adults: A deep learning approach to evaluate social determinants of health in the Jackson heart study. *PLoS ONE*. 2023;18(11):e0294050.
22. Nguyen HT, Vasconcellos HD, Keck K, Reis JP, Lewis CE, Sidney S, et al. Multivariate longitudinal data for survival analysis of cardiovascular event prediction in young adults: insights from a comparative explainable study. *BMC medical research methodology*. 2023;23(1):23.
23. Qian X, Keerman M, Zhang X, Guo H, He J, Maimaitijiang R, et al. Study on the prediction model of atherosclerotic cardiovascular disease in the rural Xinjiang population based on survival analysis. *BMC public health*. 2023;23(1):1041.
24. Ren J, Liu D, Li G, Duan J, Dong J, Liu Z. Prediction and Risk Stratification of Cardiovascular Disease in Diabetic Kidney Disease Patients. *FRONTIERS IN CARDIOVASCULAR MEDICINE*. 2022;9:923549.
25. Rigdon J, Basu S. Machine learning with sparse nutrition data to improve cardiovascular mortality risk prediction in the USA using nationally randomly sampled data. *BMJ OPEN*. 2019;9(11):e032703.
26. Sabovcik F, Ntalianis E, Cauwenberghs N, Kuznetsova T. Improving predictive performance in incident heart failure using machine learning and multi-center data. *FRONTIERS IN CARDIOVASCULAR MEDICINE*. 2022;9:1011071.
27. Segar MW, Vaduganathan M, Patel KV, McGuire DK, Butler J, Fonarow GC, et al. Machine Learning to Predict the Risk of Incident Heart Failure Hospitalization Among Patients With Diabetes: The WATCH-DM Risk Score. *Diabetes care*. 2019;42(12):2298-306.
28. Segar MW, Jaeger BC, Patel KV, Nambi V, Ndumele CE, Correa A, et al. Development and Validation of Machine Learning-Based Race-Specific Models to Predict 10-Year Risk of Heart Failure: A Multicohort Analysis. *Circulation*. 2021;143(24):2370-83.
29. Stabellini N, Cullen J, Moore JX, Dent S, Sutton AL, Shanahan J, et al. Social Determinants of Health Data Improve the Prediction of Cardiac Outcomes in Females with Breast Cancer. *Cancers*. 2023;15(18):4630.
30. Sung JM, Cho I-J, Sung D, Kim S, Kim HC, Chae M-H, et al. Development and verification of prediction models for preventing cardiovascular diseases. *PLoS ONE*. 2019;14(9):e0222809.
31. Turchin A, Morrison FJ, Shubina M, Lipkovich I, Shinde S, Ahmad NN, et al. EXIST: EXamining risk of excess adiposity-Machine learning to predict obesity-related complications. *Obesity Science and Practice*. 2023.
32. Wang H, Tucker WJ, Jonnagaddala J, Schutte AE, Jalaludin B, Liaw S-T, et al. Using machine learning to predict cardiovascular risk using self-reported questionnaires: Findings from the 45 and Up Study. *INTERNATIONAL JOURNAL OF CARDIOLOGY*. 2023;386:149-56.

33. Zhuang X-D, Tian T, Liao L-Z, Dong Y-H, Zhou H-J, Zhang S-Z, et al. Deep Phenotyping and Prediction of Long-term Cardiovascular Disease: Optimized by Machine Learning. *The Canadian journal of cardiology*. 2022;38(6):774-82.
